# Supplementary material for: Protein Identification of Spermatozoa and Seminal Plasma in Bottlenose Dolphin (Tursiops truncatus)
Source: Front Cell Dev Biol. 2021 Jul 16;9:673961. doi: 10.3389/fcell.2021.673961 (PMC8323341; doi:10.3389/fcell.2021.673961)
Supplement: Supplementary File 9 — Proteins identified in the seminal plasma (common to all of the analyzed samples) of bottlenose dolphin (Tursiops truncatus). [file Table_9.xls]

## Sheet: SP STRING annotations
Protein	Dolphin String Id	Human String Id	PEPTIDES 95%	SCORE	Preferred Name	Annotation (Homo sapiens)							Annotation...10.y
CST11	9739.XP_004329295.1	9606.ENSP00000366208	157	91.79±1.48	CST11	Cystatin-11; Has antibacterial activity against the Gram-negative bacteria E.coli. May play a role in sperm maturation and fertilization; Belongs to the cystatin family							Alpha-2-macroglobulin; Is able to inhibit all four classes of proteinases by a unique 'trapping' mechanism. This protein has a peptide stretch, called the 'bait region' which contains specific cleavage sites for different proteinases. When a proteinase cleaves the bait region, a conformational change is induced in the protein which traps the proteinase. The entrapped enzyme remains active against…
LTF	9739.XP_004311539.1	9606.ENSP00000231751	152.75	195.01±8.52	LTF	Lactotransferrin; Lactoferroxins A, B and C have opioid antagonist activity. Lactoferroxin A shows preference for mu-receptors, while lactoferroxin B and C have somewhat higher degrees of preference for kappa-receptors than for mu-receptors; Transferrins							Angiotensin-converting enzyme; Converts angiotensin I to angiotensin II by release of the terminal His-Leu, this results in an increase of the vasoconstrictor activity of angiotensin. Also able to inactivate bradykinin, a potent vasodilator. Has also a glycosidase activity which releases GPI-anchored proteins from the membrane by cleaving the mannose linkage in the GPI moiety; CD molecules
ALB	9739.XP_004322082.1	9606.ENSP00000295897	136.5	171.48±15.64	ALB	Serum albumin; Serum albumin, the main protein of plasma, has a good binding capacity for water, Ca(2+), Na(+), K(+), fatty acids, hormones, bilirubin and drugs. Its main function is the regulation of the colloidal osmotic pressure of blood. Major zinc transporter in plasma, typically binds about 80% of all plasma zinc; Belongs to the ALB/AFP/VDB family							Tartrate-resistant acid phosphatase type 5; Involved in osteopontin/bone sialoprotein dephosphorylation. Its expression seems to increase in certain pathological states such as Gaucher and Hodgkin diseases, the hairy cell, the B-cell, and the T-cell leukemias; Belongs to the metallophosphoesterase superfamily. Purple acid phosphatase family
HSP90B1	9739.XP_004326676.1	9606.ENSP00000299767	115	140.89±25.3	HSP90B1	Endoplasmin; Molecular chaperone that functions in the processing and transport of secreted proteins. When associated with CNPY3, required for proper folding of Toll-like receptors (By similarity). Functions in endoplasmic reticulum associated degradation (ERAD). Has ATPase activity; Belongs to the heat shock protein 90 family							Acrosin; Acrosin is the major protease of mammalian spermatozoa. It is a serine protease of trypsin-like cleavage specificity, it is synthesized in a zymogen form, proacrosin and stored in the acrosome; Belongs to the peptidase S1 family
PIGR	9739.XP_004319136.1	9606.ENSP00000348888	90.75	105.68±25.63	PIGR	Polymeric immunoglobulin receptor; This receptor binds polymeric IgA and IgM at the basolateral surface of epithelial cells. The complex is then transported across the cell to be secreted at the apical surface. During this process a cleavage occurs that separates the extracellular (known as the secretory component) from the transmembrane segment; V-set domain containing							Long-chain-fatty-acid--CoA ligase ACSBG2; Mediates activation of long-chain fatty acids for both synthesis of cellular lipids, and degradation via beta-oxidation. Able to activate long-chain fatty acids. Also able to activate very long-chain fatty acids; however, the relevance of such activity is unclear in vivo. Has increased ability to activate oleic and linoleic acid. May play a role in sperma…
NPC2	NA	9606.ENSP00000451112	70.25	45.77±3.5	NPC2	Epididymal secretory protein E1; Intracellular cholesterol transporter which acts in concert with NPC1 and plays an important role in the egress of cholesterol from the endosomal/lysosomal compartment. Both NPC1 and NPC2 function as the cellular 'tag team duo' (TTD) to catalyze the mobilization of cholesterol within the multivesicular environment of the late endosome (LE) to effect egress through…							Actin, cytoplasmic 2; Actins are highly conserved proteins that are involved in various types of cell motility and are ubiquitously expressed in all eukaryotic cells; Belongs to the actin family
ACE	9739.XP_004318402.1	9606.ENSP00000290866	67	66.59±14.06	ACE	Angiotensin-converting enzyme; Converts angiotensin I to angiotensin II by release of the terminal His-Leu, this results in an increase of the vasoconstrictor activity of angiotensin. Also able to inactivate bradykinin, a potent vasodilator. Has also a glycosidase activity which releases GPI-anchored proteins from the membrane by cleaving the mannose linkage in the GPI moiety; CD molecules							Alpha-actinin-4; F-actin cross-linking protein which is thought to anchor actin to a variety of intracellular structures. This is a bundling protein (Probable). Probably involved in vesicular trafficking via its association with the CART complex. The CART complex is necessary for efficient transferrin receptor recycling but not for EGFR degradation. Involved in tight junction assembly in epitheli…
HSP90AA1	NA	9606.ENSP00000335153	66.75	97.64±18.7	HSP90AA1	Heat shock protein HSP 90-alpha; Molecular chaperone that promotes the maturation, structural maintenance and proper regulation of specific target proteins involved for instance in cell cycle control and signal transduction. Undergoes a functional cycle that is linked to its ATPase activity which is essential for its chaperone activity. This cycle probably induces conformational changes in the cl…							Disintegrin and metalloproteinase domain-containing protein 10; Cleaves the membrane-bound precursor of TNF-alpha at '76-Ala-|-Val-77' to its mature soluble form. Responsible for the proteolytical release of soluble JAM3 from endothelial cells surface. Responsible for the proteolytic release of several other cell-surface proteins, including heparin-binding epidermal growth-like factor, ephrin-A2,…
PDIA3	9739.XP_004323425.1	9606.ENSP00000300289	65.5	93.34±11.08	PDIA3	Protein disulfide-isomerase A3; Protein disulfide isomerase family A member 3; Belongs to the protein disulfide isomerase family							Disintegrin and metalloproteinase domain-containing protein 2; Sperm surface membrane protein that may be involved in sperm-egg plasma membrane adhesion and fusion during fertilization. Could have a direct role in sperm-zona binding or migration of sperm from the uterus into the oviduct. Interactions with egg membrane could be mediated via binding between its disintegrin-like domain to one or mor…
LEG1	NA	9606.ENSP00000328069	62.75	41.9±16.57	C6orf58	Protein LEG1 homolog; May be involved in early liver development							Disintegrin and metalloproteinase domain-containing protein 28; May play a role in the adhesive and proteolytic events that occur during lymphocyte emigration or may function in ectodomain shedding of lymphocyte surface target proteins, such as FASL and CD40L. May be involved in sperm maturation; ADAM metallopeptidase domain containing
HSPA5	9739.XP_004313501.1	9606.ENSP00000324173	61	102.21±23.34	HSPA5	78 kDa glucose-regulated protein; Plays a role in facilitating the assembly of multimeric protein complexes inside the endoplasmic reticulum. Involved in the correct folding of proteins and degradation of misfolded proteins via its interaction with DNAJC10, probably to facilitate the release of DNAJC10 from its substrate (By similarity); Belongs to the heat shock protein 70 family							Disintegrin and metalloproteinase domain-containing protein 32; May play a role in sperm development and fertilization This is a non-catalytic metalloprotease-like protein; ADAM metallopeptidase domain containing
CTSH	9739.XP_004317871.1	9606.ENSP00000220166	52.75	45.91±10.23	CTSH	Pro-cathepsin H; Important for the overall degradation of proteins in lysosomes; Belongs to the peptidase C1 family							Angiotensinogen; Essential component of the renin-angiotensin system (RAS), a potent regulator of blood pressure, body fluid and electrolyte homeostasis; Endogenous ligands
HSPA2	9739.XP_004332386.1	9606.ENSP00000378199	50	77.13±19.98	HSPA2	Heat shock-related 70 kDa protein 2; Molecular chaperone implicated in a wide variety of cellular processes, including protection of the proteome from stress, folding and transport of newly synthesized polypeptides, activation of proteolysis of misfolded proteins and the formation and dissociation of protein complexes. Plays a pivotal role in the protein quality control system, ensuring the corre…							Adenosylhomocysteinase; Adenosylhomocysteine is a competitive inhibitor of S- adenosyl-L-methionine-dependent methyl transferase reactions; therefore adenosylhomocysteinase may play a key role in the control of methylations via regulation of the intracellular concentration of adenosylhomocysteine
QSOX1	9739.XP_004325065.1	9606.ENSP00000356574	46.75	60.7±3.89	QSOX1	Sulfhydryl oxidase 1; Catalyzes the oxidation of sulfhydryl groups in peptide and protein thiols to disulfides with the reduction of oxygen to hydrogen peroxide. May contribute to disulfide bond formation in a variety of secreted proteins. In fibroblasts, it may have tumor- suppressing capabilities being involved in growth regulation; Belongs to the quiescin-sulfhydryl oxidase (QSOX) family							Adenylate kinase isoenzyme 1; Catalyzes the reversible transfer of the terminal phosphate group between ATP and AMP. Also displays broad nucleoside diphosphate kinase activity. Plays an important role in cellular energy homeostasis and in adenine nucleotide metabolism; Belongs to the adenylate kinase family. AK1 subfamily
CALR	9739.XP_004311443.1	9606.ENSP00000320866	44.75	46.98±5.4	CALR	Calreticulin; Calcium-binding chaperone that promotes folding, oligomeric assembly and quality control in the endoplasmic reticulum (ER) via the calreticulin/calnexin cycle. This lectin interacts transiently with almost all of the monoglucosylated glycoproteins that are synthesized in the ER. Interacts with the DNA-binding domain of NR3C1 and mediates its nuclear export. Involved in maternal gene…							A-kinase anchor protein 3; May function as a regulator of both motility- and head- associated functions such as capacitation and the acrosome reaction; A-kinase anchoring proteins
ACTG1	9739.XP_004310797.1	9606.ENSP00000458162	41.25	39.25±7.61	ACTG1	Actin, cytoplasmic 2; Actins are highly conserved proteins that are involved in various types of cell motility and are ubiquitously expressed in all eukaryotic cells; Belongs to the actin family							Aldose reductase; Catalyzes the NADPH-dependent reduction of a wide variety of carbonyl-containing compounds to their corresponding alcohols with a broad range of catalytic efficiencies; Belongs to the aldo/keto reductase family
IPO5	9739.XP_004324258.1	9606.ENSP00000261574	36.75	57.67±17.81	IPO5	Importin-5; Functions in nuclear protein import as nuclear transport receptor. Serves as receptor for nuclear localization signals (NLS) in cargo substrates. Is thought to mediate docking of the importin/substrate complex to the nuclear pore complex (NPC) through binding to nucleoporin and the complex is subsequently translocated through the pore by an energy requiring, Ran- dependent mechanism. …							Serum albumin; Serum albumin, the main protein of plasma, has a good binding capacity for water, Ca(2+), Na(+), K(+), fatty acids, hormones, bilirubin and drugs. Its main function is the regulation of the colloidal osmotic pressure of blood. Major zinc transporter in plasma, typically binds about 80% of all plasma zinc; Belongs to the ALB/AFP/VDB family
GSTM3	9739.XP_004332464.1	9606.ENSP00000256594	36.5	52.75±5.09	GSTM3	Glutathione S-transferase Mu 3; Conjugation of reduced glutathione to a wide number of exogenous and endogenous hydrophobic electrophiles. May govern uptake and detoxification of both endogenous compounds and xenobiotics at the testis and brain blood barriers; Belongs to the GST superfamily. Mu family							Aldolase, fructose-bisphosphate C
AKAP3	9739.XP_004320008.1	9606.ENSP00000228850	36	58.28±10.59	AKAP3	A-kinase anchor protein 3; May function as a regulator of both motility- and head- associated functions such as capacitation and the acrosome reaction; A-kinase anchoring proteins							Muellerian-inhibiting factor; This glycoprotein, produced by the Sertoli cells of the testis, causes regression of the Muellerian duct. It is also able to inhibit the growth of tumors derived from tissues of Muellerian duct origin; Endogenous ligands
ENO1	NA	9606.ENSP00000234590	34.5	45.3±13.46	ENO1	Alpha-enolase; Multifunctional enzyme that, as well as its role in glycolysis, plays a part in various processes such as growth control, hypoxia tolerance and allergic responses. May also function in the intravascular and pericellular fibrinolytic system due to its ability to serve as a receptor and activator of plasminogen on the cell surface of several cell-types such as leukocytes and neurons.…							Aminopeptidase N; Broad specificity aminopeptidase which plays a role in the final digestion of peptides generated from hydrolysis of proteins by gastric and pancreatic proteases. Also involved in the processing of various peptides including peptide hormones, such as angiotensin III and IV, neuropeptides, and chemokines. May also be involved the cleavage of peptides bound to major histocompatibil…
DMBT1	9739.XP_004328181.1	9606.ENSP00000357905	33.25	42.17±9.87	DMBT1	Deleted in malignant brain tumors 1 protein; May be considered as a candidate tumor suppressor gene for brain, lung, esophageal, gastric, and colorectal cancers. May play roles in mucosal defense system, cellular immune defense and epithelial differentiation. May play a role as an opsonin receptor for SFTPD and SPAR in macrophage tissues throughout the body, including epithelial cells lining the …							Annexin A11; Binds specifically to calcyclin in a calcium-dependent manner (By similarity). Required for midbody formation and completion of the terminal phase of cytokinesis; Belongs to the annexin family
CFB	9739.XP_004314424.1	9606.ENSP00000416561	32.75	53.23±14.52	CFB	Complement factor B; Factor B which is part of the alternate pathway of the complement system is cleaved by factor D into 2 fragments: Ba and Bb. Bb, a serine protease, then combines with complement factor 3b to generate the C3 or C5 convertase. It has also been implicated in proliferation and differentiation of preactivated B- lymphocytes, rapid spreading of peripheral blood monocytes, stimulati…							Annexin A2; Calcium-regulated membrane-binding protein whose affinity for calcium is greatly enhanced by anionic phospholipids. It binds two calcium ions with high affinity. May be involved in heat-stress response. Inhibits PCSK9-enhanced LDLR degradation, probably reduces PCSK9 protein levels via a translational mechanism but also competes with LDLR for binding with PCSK9; Belongs to the annexin…
HYOU1	9739.XP_004313129.1	9606.ENSP00000480150	32.75	47.55±7.09	HYOU1	Hypoxia up-regulated protein 1; Has a pivotal role in cytoprotective cellular mechanisms triggered by oxygen deprivation. May play a role as a molecular chaperone and participate in protein folding; Belongs to the heat shock protein 70 family							Apolipoprotein A-I; Participates in the reverse transport of cholesterol from tissues to the liver for excretion by promoting cholesterol efflux from tissues and by acting as a cofactor for the lecithin cholesterol acyltransferase (LCAT). As part of the SPAP complex, activates spermatozoa motility; Apolipoproteins
TAX1BP1	9739.XP_004312151.1	9606.ENSP00000379612	32.25	53.2±26.96	TAX1BP1	Tax1-binding protein 1; Inhibits TNF-induced apoptosis by mediating the TNFAIP3 anti-apoptotic activity. Degraded by caspase-3-like family proteins upon TNF-induced apoptosis. May also play a role in the pro-inflammatory cytokine IL-1 signaling cascade							Apolipoprotein D; APOD occurs in the macromolecular complex with lecithin- cholesterol acyltransferase. It is probably involved in the transport and binding of bilin. Appears to be able to transport a variety of ligands in a number of different contexts; Apolipoproteins
FOLR3	NA	9606.ENSP00000481114	31	37.34±8.97	FOLR3	Folate receptor gamma; Binds to folate and reduced folic acid derivatives and mediates delivery of 5-methyltetrahydrofolate to the interior of cells. Isoform Short does not bind folate							ADP-ribosylation factor 4; GTP-binding protein that functions as an allosteric activator of the cholera toxin catalytic subunit, an ADP- ribosyltransferase. Involved in protein trafficking; may modulate vesicle budding and uncoating within the Golgi apparatus; ARF GTPase family
P4HB	9739.XP_004310344.1	9606.ENSP00000327801	30	51.17±7.99	P4HB	Protein disulfide-isomerase; This multifunctional protein catalyzes the formation, breakage and rearrangement of disulfide bonds. At the cell surface, seems to act as a reductase that cleaves disulfide bonds of proteins attached to the cell. May therefore cause structural modifications of exofacial proteins. Inside the cell, seems to form/rearrange disulfide bonds of nascent proteins. At high con…							ADP-ribosylation factor-like protein 1; GTP-binding protein that has very low efficiency as allosteric activator of the cholera toxin catalytic subunit, an ADP-ribosyltransferase. Can activate phospholipase D with very low efficiency. Important for normal function of the Golgi apparatus; ARF GTPase family
MFGE8	NA	9606.ENSP00000268150	29.75	33.74±2.93	MFGE8	Lactadherin; Plays an important role in the maintenance of intestinal epithelial homeostasis and the promotion of mucosal healing. Promotes VEGF-dependent neovascularization (By similarity). Contributes to phagocytic removal of apoptotic cells in many tissues. Specific ligand for the alpha-v/beta-3 and alpha-v/beta-5 receptors. Also binds to phosphatidylserine-enriched cell surfaces in a receptor…							Protein-glutamate O-methyltransferase; O-methyltransferase that methylates glutamate residues of target proteins to form gamma-glutamyl methyl ester residues. Methylates PCNA, suggesting it is involved in the DNA damage response
KRT1	NA	9606.ENSP00000252244	29	51.25±12.49	KRT1	Keratin, type II cytoskeletal 1; May regulate the activity of kinases such as PKC and SRC via binding to integrin beta-1 (ITB1) and the receptor of activated protein C kinase 1 (RACK1). In complex with C1QBP is a high affinity receptor for kininogen-1/HMWK; Keratins, type II							Arylsulfatase A; Hydrolyzes cerebroside sulfate; Belongs to the sulfatase family
C4BPA	NA	9606.ENSP00000356037	28	39.11±26.83	C4BPA	C4b-binding protein alpha chain; Controls the classical pathway of complement activation. It binds as a cofactor to C3b/C4b inactivator (C3bINA), which then hydrolyzes the complement fragment C4b. It also accelerates the degradation of the C4bC2a complex (C3 convertase) by dissociating the complement fragment C2a. Alpha chain binds C4b. It interacts also with anticoagulant protein S and with seru…							Acid ceramidase; Hydrolyzes the sphingolipid ceramide into sphingosine and free fatty acid
GLB1	9739.XP_004313303.1	9606.ENSP00000306920	27.75	38.45±5.36	GLB1	Beta-galactosidase; Cleaves beta-linked terminal galactosyl residues from gangliosides, glycoproteins, and glycosaminoglycans; Belongs to the glycosyl hydrolase 35 family							Atlastin-3; GTPase tethering membranes through formation of trans- homooligomers and mediating homotypic fusion of endoplasmic reticulum membranes. Functions in endoplasmic reticulum tubular network biogenesis
LYZ	NA	9606.ENSP00000261267	26.67	36.29±8.42	LYZ	Lysozyme C; Lysozymes have primarily a bacteriolytic function; those in tissues and body fluids are associated with the monocyte- macrophage system and enhance the activity of immunoagents; Lysozymes, c-type							Sodium/potassium-transporting ATPase subunit alpha-1; This is the catalytic component of the active enzyme, which catalyzes the hydrolysis of ATP coupled with the exchange of sodium and potassium ions across the plasma membrane. This action creates the electrochemical gradient of sodium and potassium ions, providing the energy for active transport of various nutrients; ATPase Na+/K+ transporting …
CP	9739.XP_004332161.1	9606.ENSP00000264613	26.5	41.14±5.67	CP	Ceruloplasmin; Ceruloplasmin is a blue, copper-binding (6-7 atoms per molecule) glycoprotein. It has ferroxidase activity oxidizing Fe(2+) to Fe(3+) without releasing radical oxygen species. It is involved in iron transport across the cell membrane. Provides Cu(2+) ions for the ascorbate-mediated deaminase degradation of the heparan sulfate chains of GPC1. May also play a role in fetal lung devel…							Sarcoplasmic/endoplasmic reticulum calcium ATPase 2; This magnesium-dependent enzyme catalyzes the hydrolysis of ATP coupled with the translocation of calcium from the cytosol to the sarcoplasmic reticulum lumen. Isoform 2 is involved in the regulation of the contraction/relaxation cycle. Acts as a regulator of TNFSF11-mediated Ca(2+) signaling pathways via its interaction with TMEM64 which is cr…
LYPD4	9739.XP_004315691.1	9606.ENSP00000476510	26	24.01±2.82	LYPD4	LY6/PLAUR domain containing 4							V-type proton ATPase subunit B, brain isoform; Non-catalytic subunit of the peripheral V1 complex of vacuolar ATPase. V-ATPase is responsible for acidifying a variety of intracellular compartments in eukaryotic cells; Belongs to the ATPase alpha/beta chains family
CTSD	NA	9606.ENSP00000236671	25.67	37.51±5.32	CTSD	Cathepsin D; Acid protease active in intracellular protein breakdown. Plays a role in APP processing following cleavage and activation by ADAM30 which leads to APP degradation. Involved in the pathogenesis of several diseases such as breast cancer and possibly Alzheimer disease; Cathepsins							B-cell receptor-associated protein 29; May play a role in anterograde transport of membrane proteins from the endoplasmic reticulum to the Golgi. May be involved in CASP8-mediated apoptosis (By similarity); Belongs to the BCAP29/BCAP31 family
GAPDH	9739.XP_004322429.1	9606.ENSP00000229239	25	34.8±8.51	GAPDH	Glyceraldehyde-3-phosphate dehydrogenase; Has both glyceraldehyde-3-phosphate dehydrogenase and nitrosylase activities, thereby playing a role in glycolysis and nuclear functions, respectively. Participates in nuclear events including transcription, RNA transport, DNA replication and apoptosis. Nuclear functions are probably due to the nitrosylase activity that mediates cysteine S-nitrosylation o…							BRI3-binding protein; Involved in tumorigenesis and may function by stabilizing p53/TP53
HSPA4L	9739.XP_004319918.1	9606.ENSP00000296464	24.75	37.91±11.37	HSPA4L	Heat shock 70 kDa protein 4L; Possesses chaperone activity in vitro where it inhibits aggregation of citrate synthase; Belongs to the heat shock protein 70 family							Basigin; Plays an important role in targeting the monocarboxylate transporters SLC16A1, SLC16A3, SLC16A8 and SLC16A11 to the plasma membrane. Plays pivotal roles in spermatogenesis, embryo implantation, neural network formation and tumor progression. Stimulates adjacent fibroblasts to produce matrix metalloproteinases (MMPS). Seems to be a receptor for oligomannosidic glycans. In vitro, promotes …
FCGBP	9739.XP_004313751.1	9606.ENSP00000481056	23.67	33.62±26.42	FCGBP	Fc fragment of IgG binding protein							Biotinidase; Catalytic release of biotin from biocytin, the product of biotin-dependent carboxylases degradation
A2M	NA	9606.ENSP00000323929	23.25	33.57±11.57	A2M	Alpha-2-macroglobulin; Is able to inhibit all four classes of proteinases by a unique 'trapping' mechanism. This protein has a peptide stretch, called the 'bait region' which contains specific cleavage sites for different proteinases. When a proteinase cleaves the bait region, a conformational change is induced in the protein which traps the proteinase. The entrapped enzyme remains active against…							Complement C2; Component C2 which is part of the classical pathway of the complement system is cleaved by activated factor C1 into two fragments: C2b and C2a. C2a, a serine protease, then combines with complement factor C4b to generate the C3 or C5 convertase; Belongs to the peptidase S1 family
CST3	NA	9606.ENSP00000381448	23	14.77±3.89	CST3	Cystatin-C; As an inhibitor of cysteine proteinases, this protein is thought to serve an important physiological role as a local regulator of this enzyme activity; Belongs to the cystatin family							Complement C3; C3 plays a central role in the activation of the complement system. Its processing by C3 convertase is the central reaction in both classical and alternative complement pathways. After activation C3b can bind covalently, via its reactive thioester, to cell surface carbohydrates or immune aggregates; C3 and PZP like, alpha-2-macroglobulin domain containing
TF	9739.XP_004329553.1	9606.ENSP00000385834	23	37.74±17.06	TF	Serotransferrin; Transferrins are iron binding transport proteins which can bind two Fe(3+) ions in association with the binding of an anion, usually bicarbonate. It is responsible for the transport of iron from sites of absorption and heme degradation to those of storage and utilization. Serum transferrin may also have a further role in stimulating cell proliferation							C4b-binding protein alpha chain; Controls the classical pathway of complement activation. It binds as a cofactor to C3b/C4b inactivator (C3bINA), which then hydrolyzes the complement fragment C4b. It also accelerates the degradation of the C4bC2a complex (C3 convertase) by dissociating the complement fragment C2a. Alpha chain binds C4b. It interacts also with anticoagulant protein S and with seru…
PDILT	9739.XP_004322078.1	9606.ENSP00000305465	22.75	35.69±8.4	PDILT	Protein disulfide-isomerase-like protein of the testis; Probable redox-inactive chaperone involved in spermatogenesis; Belongs to the protein disulfide isomerase family							Carbonic anhydrase 2; Essential for bone resorption and osteoclast differentiation (By similarity). Reversible hydration of carbon dioxide. Can hydrate cyanamide to urea. Involved in the regulation of fluid secretion into the anterior chamber of the eye. Contributes to intracellular pH regulation in the duodenal upper villous epithelium during proton-coupled peptide absorption. Stimulates the chl…
HSPA8	NA	9606.ENSP00000432083	22.5	39.98±12.55	HSPA8	Heat shock cognate 71 kDa protein; Molecular chaperone implicated in a wide variety of cellular processes, including protection of the proteome from stress, folding and transport of newly synthesized polypeptides, activation of proteolysis of misfolded proteins and the formation and dissociation of protein complexes. Plays a pivotal role in the protein quality control system, ensuring the correct…							Calmodulin-1; Calmodulin mediates the control of a large number of enzymes, ion channels, aquaporins and other proteins through calcium-binding. Among the enzymes to be stimulated by the calmodulin-calcium complex are a number of protein kinases and phosphatases. Together with CCP110 and centrin, is involved in a genetic pathway that regulates the centrosome cycle and progression through cytokine…
PKM	9739.XP_004325401.1	9606.ENSP00000320171	21.25	24.86±9.6	PKM	Pyruvate kinase PKM; Glycolytic enzyme that catalyzes the transfer of a phosphoryl group from phosphoenolpyruvate (PEP) to ADP, generating ATP. Stimulates POU5F1-mediated transcriptional activation. Plays a general role in caspase independent cell death of tumor cells. The ratio between the highly active tetrameric form and nearly inactive dimeric form determines whether glucose carbons are chann…							Calreticulin; Calcium-binding chaperone that promotes folding, oligomeric assembly and quality control in the endoplasmic reticulum (ER) via the calreticulin/calnexin cycle. This lectin interacts transiently with almost all of the monoglucosylated glycoproteins that are synthesized in the ER. Interacts with the DNA-binding domain of NR3C1 and mediates its nuclear export. Involved in maternal gene…
NBR1	9739.XP_004312246.1	9606.ENSP00000411250	20.75	28.43±12.73	NBR1	Next to BRCA1 gene 1 protein; Acts probably as a receptor for selective autophagosomal degradation of ubiquitinated targets; Zinc fingers ZZ-type							Cullin-associated NEDD8-dissociated protein 1; Key assembly factor of SCF (SKP1-CUL1-F-box protein) E3 ubiquitin ligase complexes that promotes the exchange of the substrate-recognition F-box subunit in SCF complexes, thereby playing a key role in the cellular repertoire of SCF complexes. Acts as a F-box protein exchange factor. The exchange activity of CAND1 is coupled with cycles of neddylation…
PDIA6	9739.XP_004310310.1	9606.ENSP00000385385	20.5	38.78±8.02	PDIA6	Protein disulfide-isomerase A6; May function as a chaperone that inhibits aggregation of misfolded proteins. Negatively regulates the unfolded protein response (UPR) through binding to UPR sensors such as ERN1, which in turn inactivates ERN1 signaling. May also regulate the UPR via the EIF2AK3 UPR sensor. Plays a role in platelet aggregation and activation by agonists such as convulxin, collagen …							Calnexin; Calcium-binding protein that interacts with newly synthesized glycoproteins in the endoplasmic reticulum. It may act in assisting protein assembly and/or in the retention within the ER of unassembled protein subunits. It seems to play a major role in the quality control apparatus of the ER by the retention of incorrectly folded proteins. Associated with partial T-cell antigen receptor c…
SERPINA1	NA	9606.ENSP00000416066	19.5	27.94±4.51	SERPINA1	Alpha-1-antitrypsin; Inhibitor of serine proteases. Its primary target is elastase, but it also has a moderate affinity for plasmin and thrombin. Irreversibly inhibits trypsin, chymotrypsin and plasminogen activator. The aberrant form inhibits insulin-induced NO synthesis in platelets, decreases coagulation time and has proteolytic activity against insulin and plasmin; Belongs to the serpin family							Adenylyl cyclase-associated protein 1; Directly regulates filament dynamics and has been implicated in a number of complex developmental and morphological processes, including mRNA localization and the establishment of cell polarity; Belongs to the CAP family
NT5E	NA	9606.ENSP00000257770	19	30.43±7.06	NT5E	5'-nucleotidase; Hydrolyzes extracellular nucleotides into membrane permeable nucleosides. Exhibits AMP-, NAD-, and NMN-nucleosidase activities; Belongs to the 5'-nucleotidase family							Calpain-5; Calcium-regulated non-lysosomal thiol-protease; C2 domain containing
KRT9	NA	9606.ENSP00000246662	18	34.55±11.64	KRT9	Keratin, type I cytoskeletal 9; May serve an important special function either in the mature palmar and plantar skin tissue or in the morphogenetic program of the formation of these tissues. Plays a role in keratin filament assembly; Belongs to the intermediate filament family							Coiled-coil domain containing 126
EEF1A1	NA	9606.ENSP00000339063	17.75	22.09±5.79	EEF1A1	Elongation factor 1-alpha 1; This protein promotes the GTP-dependent binding of aminoacyl-tRNA to the A-site of ribosomes during protein biosynthesis. With PARP1 and TXK, forms a complex that acts as a T helper 1 (Th1) cell-specific transcription factor and binds the promoter of IFN-gamma to directly regulate its transcription, and is thus involved importantly in Th1 cytokine production; Belongs …							Cell cycle progression protein 1; Acts as an assembly platform for Rho protein signaling complexes. Limits guanine nucleotide exchange activity of MCF2L toward RHOA, which results in an inhibition of both its transcriptional activation ability and its transforming activity. Does not inhibit activity of MCF2L toward CDC42, or activity of MCF2 toward either RHOA or CDC42 (By similarity). May be inv…
PGAM1	9739.XP_004314634.1	9606.ENSP00000359991	17.5	28.19±11.56	PGAM1	Phosphoglycerate mutase 1; Interconversion of 3- and 2-phosphoglycerate with 2,3- bisphosphoglycerate as the primer of the reaction. Can also catalyze the reaction of EC 5.4.2.4 (synthase), but with a reduced activity							T-complex protein 1 subunit beta; Molecular chaperone; assists the folding of proteins upon ATP hydrolysis. As part of the BBS/CCT complex may play a role in the assembly of BBSome, a complex involved in ciliogenesis regulating transports vesicles to the cilia. Known to play a role, in vitro, in the folding of actin and tubulin; Chaperonins
C2	9739.XP_004314422.1	9606.ENSP00000299367	17.25	26.96±15.12	C2	Complement C2; Component C2 which is part of the classical pathway of the complement system is cleaved by activated factor C1 into two fragments: C2b and C2a. C2a, a serine protease, then combines with complement factor C4b to generate the C3 or C5 convertase; Belongs to the peptidase S1 family							T-complex protein 1 subunit gamma; Molecular chaperone; assists the folding of proteins upon ATP hydrolysis. As part of the BBS/CCT complex may play a role in the assembly of BBSome, a complex involved in ciliogenesis regulating transports vesicles to the cilia. Known to play a role, in vitro, in the folding of actin and tubulin; Chaperonins
GSN	9739.XP_004326479.1	9606.ENSP00000362924	17	22.93±4.93	GSN	Gelsolin; Calcium-regulated, actin-modulating protein that binds to the plus (or barbed) ends of actin monomers or filaments, preventing monomer exchange (end-blocking or capping). It can promote the assembly of monomers into filaments (nucleation) as well as sever filaments already formed. Plays a role in ciliogenesis; Gelsolin/villins							T-complex protein 1 subunit delta; Molecular chaperone; assists the folding of proteins upon ATP hydrolysis. As part of the BBS/CCT complex may play a role in the assembly of BBSome, a complex involved in ciliogenesis regulating transports vesicles to the cilia. Known to play a role, in vitro, in the folding of actin and tubulin; Chaperonins
SERPING1	NA	9606.ENSP00000278407	16.75	24.71±8.04	SERPING1	Plasma protease C1 inhibitor; Activation of the C1 complex is under control of the C1- inhibitor. It forms a proteolytically inactive stoichiometric complex with the C1r or C1s proteases. May play a potentially crucial role in regulating important physiological pathways including complement activation, blood coagulation, fibrinolysis and the generation of kinins. Very efficient inhibitor of FXIIa…							T-complex protein 1 subunit epsilon; Molecular chaperone; assists the folding of proteins upon ATP hydrolysis. As part of the BBS/CCT complex may play a role in the assembly of BBSome, a complex involved in ciliogenesis regulating transports vesicles to the cilia. Known to play a role, in vitro, in the folding of actin and tubulin; Chaperonins
TUBB	NA	9606.ENSP00000339001	16.75	29.44±3.78	TUBB	Tubulin beta chain; Tubulin is the major constituent of microtubules. It binds two moles of GTP, one at an exchangeable site on the beta chain and one at a non-exchangeable site on the alpha chain; Tubulins							T-complex protein 1 subunit zeta; Molecular chaperone; assists the folding of proteins upon ATP hydrolysis. Known to play a role, in vitro, in the folding of actin and tubulin; Belongs to the TCP-1 chaperonin family
UBA1	9739.XP_004324854.1	9606.ENSP00000338413	16.75	27.11±14.3	UBA1	Ubiquitin-like modifier-activating enzyme 1; Catalyzes the first step in ubiquitin conjugation to mark cellular proteins for degradation through the ubiquitin- proteasome system. Activates ubiquitin by first adenylating its C-terminal glycine residue with ATP, and thereafter linking this residue to the side chain of a cysteine residue in E1, yielding a ubiquitin-E1 thioester and free AMP. Essenti…							T-complex protein 1 subunit eta; Molecular chaperone; assists the folding of proteins upon ATP hydrolysis. Known to play a role, in vitro, in the folding of actin and tubulin (By similarity); Chaperonins
GPD1L	9739.XP_004317682.1	9606.ENSP00000282541	16	24.42±11.46	GPD1L	Glycerol-3-phosphate dehydrogenase 1-like protein; Plays a role in regulating cardiac sodium current; decreased enzymatic activity with resulting increased levels of glycerol 3-phosphate activating the DPD1L-dependent SCN5A phosphorylation pathway, may ultimately lead to decreased sodium current; cardiac sodium current may also be reduced due to alterations of NAD(H) balance induced by DPD1L							T-complex protein 1 subunit theta; Molecular chaperone; assists the folding of proteins upon ATP hydrolysis. As part of the BBS/CCT complex may play a role in the assembly of BBSome, a complex involved in ciliogenesis regulating transports vesicles to the cilia. Known to play a role, in vitro, in the folding of actin and tubulin; Belongs to the TCP-1 chaperonin family
KLK6	9739.XP_004324271.1	9606.ENSP00000366047	16	24.14±10.4	KLK6	Kallikrein-6; Serine protease which exhibits a preference for Arg over Lys in the substrate P1 position and for Ser or Pro in the P2 position. Shows activity against amyloid precursor protein, myelin basic protein, gelatin, casein and extracellular matrix proteins such as fibronectin, laminin, vitronectin and collagen. Degrades alpha-synuclein and prevents its polymerization, indicating that it m…							Monocyte differentiation antigen CD14; Coreceptor for bacterial lipopolysaccharide. In concert with LBP, binds to monomeric lipopolysaccharide and delivers it to the LY96/TLR4 complex, thereby mediating the innate immune response to bacterial lipopolysaccharide (LPS). Acts via MyD88, TIRAP and TRAF6, leading to NF-kappa-B activation, cytokine secretion and the inflammatory response. Acts as a cor…
RPN1	NA	9606.ENSP00000296255	16	28.24±5.44	RPN1	Dolichyl-diphosphooligosaccharide--protein glycosyltransferase subunit 1; Essential subunit of the N-oligosaccharyl transferase (OST) complex which catalyzes the transfer of a high mannose oligosaccharide from a lipid-linked oligosaccharide donor to an asparagine residue within an Asn-X-Ser/Thr consensus motif in nascent polypeptide chains; Belongs to the OST1 family							CD44 antigen; Receptor for hyaluronic acid (HA). Mediates cell-cell and cell-matrix interactions through its affinity for HA, and possibly also through its affinity for other ligands such as osteopontin, collagens, and matrix metalloproteinases (MMPs). Adhesion with HA plays an important role in cell migration, tumor growth and progression. In cancer cells, may play an important role in invadopod…
VCP	9739.XP_004316142.1	9606.ENSP00000351777	16	27.12±10.55	VCP	Transitional endoplasmic reticulum ATPase; Necessary for the fragmentation of Golgi stacks during mitosis and for their reassembly after mitosis. Involved in the formation of the transitional endoplasmic reticulum (tER). The transfer of membranes from the endoplasmic reticulum to the Golgi apparatus occurs via 50-70 nm transition vesicles which derive from part-rough, part-smooth transitional ele…							CD9 antigen; Involved in platelet activation and aggregation. Regulates paranodal junction formation. Involved in cell adhesion, cell motility and tumor metastasis. Required for sperm-egg fusion; Belongs to the tetraspanin (TM4SF) family
PRDX4	NA	9606.ENSP00000368646	15.5	24.23±3.56	PRDX4	Peroxiredoxin-4; Thiol-specific peroxidase that catalyzes the reduction of hydrogen peroxide and organic hydroperoxides to water and alcohols, respectively. Plays a role in cell protection against oxidative stress by detoxifying peroxides and as sensor of hydrogen peroxide-mediated signaling events. Regulates the activation of NF-kappa-B in the cytosol by a modulation of I- kappa-B-alpha phosphor…							Ubiquitin-conjugating enzyme E2 R1; Accepts ubiquitin from the E1 complex and catalyzes its covalent attachment to other proteins. In vitro catalyzes 'Lys- 48'-linked polyubiquitination. Cooperates with the E2 UBCH5C and the SCF(FBXW11) E3 ligase complex for the polyubiquitination of NFKBIA leading to its subsequent proteasomal degradation. Performs ubiquitin chain elongation building ubiquitin c…
GLUL	NA	9606.ENSP00000307900	15	22.42±3.11	GLUL	Glutamine synthetase; This enzyme has 2 functions: it catalyzes the production of glutamine and 4-aminobutanoate (gamma-aminobutyric acid, GABA), the latter in a pyridoxal phosphate-independent manner (By similarity). Essential for proliferation of fetal skin fibroblasts; Belongs to the glutamine synthetase family							Cell division control protein 42 homolog; Plasma membrane-associated small GTPase which cycles between an active GTP-bound and an inactive GDP-bound state. In active state binds to a variety of effector proteins to regulate cellular responses. Involved in epithelial cell polarization processes. Regulates the bipolar attachment of spindle microtubules to kinetochores before chromosome congression …
PDXDC1	9739.XP_004312290.1	9606.ENSP00000379691	14.75	23.23±8.51	PDXDC1	Pyridoxal-dependent decarboxylase domain-containing protein 1; Pyridoxal dependent decarboxylase domain containing 1; Belongs to the group II decarboxylase family							Cilia- and flagella-associated protein 36; May act as an effector for ARL3; Belongs to the CFAP36 family
YWHAZ	NA	9606.ENSP00000379287	14.75	26.18±3.8	YWHAZ	14-3-3 protein zeta/delta; Adapter protein implicated in the regulation of a large spectrum of both general and specialized signaling pathways. Binds to a large number of partners, usually by recognition of a phosphoserine or phosphothreonine motif. Binding generally results in the modulation of the activity of the binding partner; Belongs to the 14-3-3 family							Complement factor B; Factor B which is part of the alternate pathway of the complement system is cleaved by factor D into 2 fragments: Ba and Bb. Bb, a serine protease, then combines with complement factor 3b to generate the C3 or C5 convertase. It has also been implicated in proliferation and differentiation of preactivated B- lymphocytes, rapid spreading of peripheral blood monocytes, stimulati…
KRT10	NA	9606.ENSP00000269576	14.67	24.54±17.37	KRT10	Keratin, type I cytoskeletal 10; Keratins, type I							Complement factor D; Factor D cleaves factor B when the latter is complexed with factor C3b, activating the C3bbb complex, which then becomes the C3 convertase of the alternate pathway. Its function is homologous to that of C1s in the classical pathway; Belongs to the peptidase S1 family
RBP4	NA	9606.ENSP00000360522	14.5	18.41±1.32	RBP4	Retinol-binding protein 4; Retinol-binding protein that mediates retinol transport in blood plasma. Delivers retinol from the liver stores to the peripheral tissues (Probable). Transfers the bound all-trans retinol to STRA6, that then facilitates retinol transport across the cell membrane; Belongs to the calycin superfamily. Lipocalin family							Chitinase domain-containing protein 1; Saccharide- and LPS-binding protein with possible roles in pathogen sensing and endotoxin neutralization. Ligand-binding specificity relates to the length of the oligosaccharides, with preference for chitotetraose (in vitro); Belongs to the glycosyl hydrolase 18 family
PSAP	9739.XP_004317570.1	9606.ENSP00000378394	14	16.53±1.89	PSAP	Prosaposin; Saposins are specific low-molecular mass non-enzymic proteins, they participate in the lysosomal degradation of sphingolipids, which takes place by the sequential action of specific hydrolases; Endogenous ligands							Creatine kinase, mitochondrial 1B; Reversibly catalyzes the transfer of phosphate between ATP and various phosphogens (e.g. creatine phosphate). Creatine kinase isoenzymes play a central role in energy transduction in tissues with large, fluctuating energy demands, such as skeletal muscle, heart, brain and spermatozoa
AGT	9739.XP_004310296.1	9606.ENSP00000355627	13.5	23.17±10.11	AGT	Angiotensinogen; Essential component of the renin-angiotensin system (RAS), a potent regulator of blood pressure, body fluid and electrolyte homeostasis; Endogenous ligands							Calmegin; Functions during spermatogenesis as a chaperone for a range of client proteins that are important for sperm adhesion onto the egg zona pellucida and for subsequent penetration of the zona pellucida. Required for normal sperm migration from the uterus into the oviduct. Required for normal male fertility. Binds calcium ions (By similarity)
GOT1	9739.XP_004314475.1	9606.ENSP00000359539	13.5	23.12±9.81	GOT1	Aspartate aminotransferase, cytoplasmic; Biosynthesis of L-glutamate from L-aspartate or L- cysteine. Important regulator of levels of glutamate, the major excitatory neurotransmitter of the vertebrate central nervous system. Acts as a scavenger of glutamate in brain neuroprotection. The aspartate aminotransferase activity is involved in hepatic glucose synthesis during development and in adipocy…							Clathrin heavy chain 1; Clathrin is the major protein of the polyhedral coat of coated pits and vesicles. Two different adapter protein complexes link the clathrin lattice either to the plasma membrane or to the trans-Golgi network. Acts as component of the TACC3/ch- TOG/clathrin complex proposed to contribute to stabilization of kinetochore fibers of the mitotic spindle by acting as inter- micro…
SIL1	9739.XP_004320165.1	9606.ENSP00000378294	13.25	18.34±2.94	SIL1	Nucleotide exchange factor SIL1; Required for protein translocation and folding in the endoplasmic reticulum (ER). Functions as a nucleotide exchange factor for the ER lumenal chaperone HSPA5; Belongs to the SIL1 family							Clusterin; Isoform 1 functions as extracellular chaperone that prevents aggregation of nonnative proteins. Prevents stress- induced aggregation of blood plasma proteins. Inhibits formation of amyloid fibrils by APP, APOC2, B2M, CALCA, CSN3, SNCA and aggregation-prone LYZ variants (in vitro). Does not require ATP. Maintains partially unfolded proteins in a state appropriate for subsequent refoldin…
SDCBP	9739.XP_004325430.1	9606.ENSP00000260130	13	16.97±7.38	SDCBP	Syntenin-1; Multifunctional adapter protein involved in diverse array of functions including trafficking of transmembrane proteins, neuro and immunomodulation, exosome biogenesis, and tumorigenesis. Positively regulates TGFB1- mediated SMAD2/3 activation and TGFB1-induced epithelial-to- mesenchymal transition (EMT) and cell migration in various cell types. May increase TGFB1 signaling by enhancin…							UMP-CMP kinase; Catalyzes the phosphorylation of pyrimidine nucleoside monophosphates at the expense of ATP. Plays an important role in de novo pyrimidine nucleotide biosynthesis. Has preference for UMP and CMP as phosphate acceptors. Also displays broad nucleoside diphosphate kinase activity; Belongs to the adenylate kinase family. UMP-CMP kinase subfamily
CREG1	9739.XP_004330155.1	9606.ENSP00000359540	12.75	18.27±1.67	CREG1	Protein CREG1; May contribute to the transcriptional control of cell growth and differentiation. Antagonizes transcriptional activation and cellular transformation by the adenovirus E1A protein. The transcriptional control activity of cell growth requires interaction with IGF2R; Belongs to the CREG family							Cytosolic non-specific dipeptidase; Hydrolyzes a variety of dipeptides including L-carnosine but has a strong preference for Cys-Gly. Acts as a functional tumor suppressor in gastric cancer via activation of the mitogen-activated protein kinase (MAPK) pathway. An elevated level of CNDP2 activates the p38 and JNK MAPK pathways to induce cell apoptosis, and a lower level of CNDP2 activates the ERK …
PRKACA	9739.XP_004327167.1	9606.ENSP00000309591	12.67	24.01±9.97	PRKACA	cAMP-dependent protein kinase catalytic subunit alpha; Phosphorylates a large number of substrates in the cytoplasm and the nucleus. Regulates the abundance of compartmentalized pools of its regulatory subunits through phosphorylation of PJA2 which binds and ubiquitinates these subunits, leading to their subsequent proteolysis. Phosphorylates CDC25B, ABL1, NFKB1, CLDN3, PSMC5/RPT6, PJA2, RYR2, RO…							Conserved oligomeric Golgi complex subunit 3; Involved in ER-Golgi transport; Belongs to the COG3 family
ATP2A2	9739.XP_004310892.1	9606.ENSP00000440045	12.5	23.28±13.43	ATP2A2	Sarcoplasmic/endoplasmic reticulum calcium ATPase 2; This magnesium-dependent enzyme catalyzes the hydrolysis of ATP coupled with the translocation of calcium from the cytosol to the sarcoplasmic reticulum lumen. Isoform 2 is involved in the regulation of the contraction/relaxation cycle. Acts as a regulator of TNFSF11-mediated Ca(2+) signaling pathways via its interaction with TMEM64 which is cr…							Coatomer subunit alpha; The coatomer is a cytosolic protein complex that binds to dilysine motifs and reversibly associates with Golgi non- clathrin-coated vesicles, which further mediate biosynthetic protein transport from the ER, via the Golgi up to the trans Golgi network. Coatomer complex is required for budding from Golgi membranes, and is essential for the retrograde Golgi-to-ER transport o…
MANF	9739.XP_004329187.1	9606.ENSP00000432799	12.5	21±6.65	MANF	Mesencephalic astrocyte-derived neurotrophic factor; Selectively promotes the survival of dopaminergic neurons of the ventral mid-brain. Modulates GABAergic transmission to the dopaminergic neurons of the substantia nigra. Enhances spontaneous, as well as evoked, GABAergic inhibitory postsynaptic currents in dopaminergic neurons (By similarity). Inhibits cell proliferation and endoplasmic reticul…							Coatomer subunit gamma-1; The coatomer is a cytosolic protein complex that binds to dilysine motifs and reversibly associates with Golgi non- clathrin-coated vesicles, which further mediate biosynthetic protein transport from the ER, via the Golgi up to the trans Golgi network. Coatomer complex is required for budding from Golgi membranes, and is essential for the retrograde Golgi-to-ER transport…
SQSTM1	9739.XP_004332136.1	9606.ENSP00000374455	12.5	21.38±8.72	SQSTM1	Sequestosome-1; Autophagy receptor that interacts directly with both the cargo to become degraded and an autophagy modifier of the MAP1 LC3 family. Along with WDFY3, involved in the formation and autophagic degradation of cytoplasmic ubiquitin-containing inclusions (p62 bodies, ALIS/aggresome-like induced structures). Along with SQSTM1, required to recruit ubiquitinated proteins to PML bodies in …							Coatomer subunit gamma-2; The coatomer is a cytosolic protein complex that binds to dilysine motifs and reversibly associates with Golgi non- clathrin-coated vesicles, which further mediate biosynthetic protein transport from the ER, via the Golgi up to the trans Golgi network. Coatomer complex is required for budding from Golgi membranes, and is essential for the retrograde Golgi-to-ER transport…
HK1	9739.XP_004320595.1	9606.ENSP00000402103	12.25	22.05±12.07	HK1	Hexokinase-1; Hexokinase 1							Ceruloplasmin; Ceruloplasmin is a blue, copper-binding (6-7 atoms per molecule) glycoprotein. It has ferroxidase activity oxidizing Fe(2+) to Fe(3+) without releasing radical oxygen species. It is involved in iron transport across the cell membrane. Provides Cu(2+) ions for the ascorbate-mediated deaminase degradation of the heparan sulfate chains of GPC1. May also play a role in fetal lung devel…
SCCPDH	9739.XP_004324445.1	9606.ENSP00000355467	12.25	18.02±7.11	SCCPDH	Saccharopine dehydrogenase-like oxidoreductase; Saccharopine dehydrogenase; Belongs to the saccharopine dehydrogenase family							Serine/threonine-protein phosphatase CPPED1; Protein phosphatase that dephosphorylates AKT family kinase specifically at 'Ser-473', blocking cell cycle progression and promoting cell apoptosis. May play an inhibitory role in glucose uptake by adipocytes; Belongs to the metallophosphoesterase superfamily. CPPED1 family
CTSB	NA	9606.ENSP00000345672	12	19.61±5.65	CTSB	Cathepsin B; Thiol protease which is believed to participate in intracellular degradation and turnover of proteins. Has also been implicated in tumor invasion and metastasis; Cathepsins							Protein CREG1; May contribute to the transcriptional control of cell growth and differentiation. Antagonizes transcriptional activation and cellular transformation by the adenovirus E1A protein. The transcriptional control activity of cell growth requires interaction with IGF2R; Belongs to the CREG family
LCN2	9739.XP_004311304.1	9606.ENSP00000362108	12	18.83±2.52	LCN2	Neutrophil gelatinase-associated lipocalin; Iron-trafficking protein involved in multiple processes such as apoptosis, innate immunity and renal development. Binds iron through association with 2,5-dihydroxybenzoic acid (2,5- DHBA), a siderophore that shares structural similarities with bacterial enterobactin, and delivers or removes iron from the cell, depending on the context. Iron-bound form (…							Cystatin-11; Has antibacterial activity against the Gram-negative bacteria E.coli. May play a role in sperm maturation and fertilization; Belongs to the cystatin family
TPI1	9739.XP_004314802.1	9606.ENSP00000229270	12	24.62±6.14	TPI1	Triosephosphate isomerase 1; Belongs to the triosephosphate isomerase family							Cystatin-C; As an inhibitor of cysteine proteinases, this protein is thought to serve an important physiological role as a local regulator of this enzyme activity; Belongs to the cystatin family
CCPG1	9739.XP_004317931.1	9606.ENSP00000403400	11.75	17.59±11.18	CCPG1	Cell cycle progression protein 1; Acts as an assembly platform for Rho protein signaling complexes. Limits guanine nucleotide exchange activity of MCF2L toward RHOA, which results in an inhibition of both its transcriptional activation ability and its transforming activity. Does not inhibit activity of MCF2L toward CDC42, or activity of MCF2 toward either RHOA or CDC42 (By similarity). May be inv…							Cathepsin B; Thiol protease which is believed to participate in intracellular degradation and turnover of proteins. Has also been implicated in tumor invasion and metastasis; Cathepsins
LRG1	9739.XP_004317495.1	9606.ENSP00000302621	11.75	21.44±3.74	LRG1	Leucine rich alpha-2-glycoprotein 1							Cathepsin D; Acid protease active in intracellular protein breakdown. Plays a role in APP processing following cleavage and activation by ADAM30 which leads to APP degradation. Involved in the pathogenesis of several diseases such as breast cancer and possibly Alzheimer disease; Cathepsins
PROM2	9739.XP_004312777.1	9606.ENSP00000318270	11.75	15.17±4.35	PROM2	Prominin-2; Prominin 2							Pro-cathepsin H; Important for the overall degradation of proteins in lysosomes; Belongs to the peptidase C1 family
KRT2	NA	9606.ENSP00000310861	11.67	23.28±15.49	KRT2	Keratin, type II cytoskeletal 2 epidermal; Probably contributes to terminal cornification. Associated with keratinocyte activation, proliferation and keratinization; Keratins, type II							Cathepsin L1; Important for the overall degradation of proteins in lysosomes; Cathepsins
RARRES1	NA	9606.ENSP00000237696	11.67	12.64±5.45	RARRES1	Retinoic acid receptor responder protein 1; Inhibitor of the cytoplasmic carboxypeptidase AGBL2, may regulate the alpha-tubulin tyrosination cycle							Cathepsin S; Thiol protease. Key protease responsible for the removal of the invariant chain from MHC class II molecules. The bond- specificity of this proteinase is in part similar to the specificities of cathepsin L and cathepsin N; Cathepsins
AKR1B1	9739.XP_004321939.1	9606.ENSP00000285930	11.5	20.07±6.12	AKR1B1	Aldose reductase; Catalyzes the NADPH-dependent reduction of a wide variety of carbonyl-containing compounds to their corresponding alcohols with a broad range of catalytic efficiencies; Belongs to the aldo/keto reductase family							Cullin-3; Core component of multiple cullin-RING-based BCR (BTB- CUL3-RBX1) E3 ubiquitin-protein ligase complexes which mediate the ubiquitination and subsequent proteasomal degradation of target proteins. BCR complexes and ARIH1 collaborate in tandem to mediate ubiquitination of target proteins. As a scaffold protein may contribute to catalysis through positioning of the substrate and the ubiqui…
FTH1	NA	NA	11.35	6.75±2.06	FTH1	Ferritin heavy chain; Stores iron in a soluble, non-toxic, readily available form. Important for iron homeostasis. Has ferroxidase activity. Iron is taken up in the ferrous form and deposited as ferric hydroxides after oxidation. Also plays a role in delivery of iron to cells. Mediates iron uptake in capsule cells of the developing kidney (By similarity); Belongs to the ferritin family							NADH-cytochrome b5 reductase 3; Desaturation and elongation of fatty acids, cholesterol biosynthesis, drug metabolism, and, in erythrocyte, methemoglobin reduction
JCHAIN	NA	9606.ENSP00000254801	11.33	16.99±2.3	IGJ	Immunoglobulin J chain; Serves to link two monomer units of either IgM or IgA. In the case of IgM, the J chain-joined dimer is a nucleating unit for the IgM pentamer, and in the case of IgA it induces larger polymers. It also help to bind these immunoglobulins to secretory component							Acyl-CoA-binding protein; Binds medium- and long-chain acyl-CoA esters with very high affinity and may function as an intracellular carrier of acyl-CoA esters. It is also able to displace diazepam from the benzodiazepine (BZD) recognition site located on the GABA type A receptor. It is therefore possible that this protein also acts as a neuropeptide to modulate the action of the GABA receptor
C3	9739.XP_004332146.1	9606.ENSP00000245907	11.25	17.39±3.77	C3	Complement C3; C3 plays a central role in the activation of the complement system. Its processing by C3 convertase is the central reaction in both classical and alternative complement pathways. After activation C3b can bind covalently, via its reactive thioester, to cell surface carbohydrates or immune aggregates; C3 and PZP like, alpha-2-macroglobulin domain containing							Dolichyl-diphosphooligosaccharide--protein glycosyltransferase 48 kDa subunit; Essential subunit of the N-oligosaccharyl transferase (OST) complex which catalyzes the transfer of a high mannose oligosaccharide from a lipid-linked oligosaccharide donor to an asparagine residue within an Asn-X-Ser/Thr consensus motif in nascent polypeptide chains. Required for the assembly of both SST3A- and SS3B-c…
CKMT1	NA	9606.ENSP00000300283	11.25	16.53±3.03	CKMT1B	Creatine kinase, mitochondrial 1B; Reversibly catalyzes the transfer of phosphate between ATP and various phosphogens (e.g. creatine phosphate). Creatine kinase isoenzymes play a central role in energy transduction in tissues with large, fluctuating energy demands, such as skeletal muscle, heart, brain and spermatozoa							Beta-defensin 128; Has antibacterial activity; Defensins, beta
TMX4	NA	9606.ENSP00000246024	11.25	16.28±5.08	TMX4	Thioredoxin related transmembrane protein 4; Protein disulfide isomerases							Defensin, beta 130; Antimicrobial host-defense peptide. Has an antiplasmodial activity
ADAM2	NA	9606.ENSP00000265708	11	17.03±4.68	ADAM2	Disintegrin and metalloproteinase domain-containing protein 2; Sperm surface membrane protein that may be involved in sperm-egg plasma membrane adhesion and fusion during fertilization. Could have a direct role in sperm-zona binding or migration of sperm from the uterus into the oviduct. Interactions with egg membrane could be mediated via binding between its disintegrin-like domain to one or mor…							Diablo homolog, mitochondrial; Promotes apoptosis by activating caspases in the cytochrome c/Apaf-1/caspase-9 pathway. Acts by opposing the inhibitory activity of inhibitor of apoptosis proteins (IAP). Inhibits the activity of BIRC6/bruce by inhibiting its binding to caspases. Isoform 3 attenuates the stability and apoptosis- inhibiting activity of XIAP/BIRC4 by promoting XIAP/BIRC4 ubiquitinatio…
AMH	9739.XP_004314033.1	9606.ENSP00000221496	11	21.41±4.24	AMH	Muellerian-inhibiting factor; This glycoprotein, produced by the Sertoli cells of the testis, causes regression of the Muellerian duct. It is also able to inhibit the growth of tumors derived from tissues of Muellerian duct origin; Endogenous ligands							Deleted in malignant brain tumors 1 protein; May be considered as a candidate tumor suppressor gene for brain, lung, esophageal, gastric, and colorectal cancers. May play roles in mucosal defense system, cellular immune defense and epithelial differentiation. May play a role as an opsonin receptor for SFTPD and SPAR in macrophage tissues throughout the body, including epithelial cells lining the …
UBB	NA	9606.ENSP00000304697	11	18.43±1.28	UBB	Polyubiquitin-B; Ubiquitin: Exists either covalently attached to another protein, or free (unanchored). When covalently bound, it is conjugated to target proteins via an isopeptide bond either as a monomer (monoubiquitin), a polymer linked via different Lys residues of the ubiquitin (polyubiquitin chains) or a linear polymer linked via the initiator Met of the ubiquitin (linear polyubiquitin chai…							DnaJ homolog subfamily A member 2; Co-chaperone of Hsc70. Stimulates ATP hydrolysis and the folding of unfolded proteins mediated by HSPA1A/B (in vitro); DNAJ heat shock proteins
CFD	NA	9606.ENSP00000332139	10.67	13.65±6.97	CFD	Complement factor D; Factor D cleaves factor B when the latter is complexed with factor C3b, activating the C3bbb complex, which then becomes the C3 convertase of the alternate pathway. Its function is homologous to that of C1s in the classical pathway; Belongs to the peptidase S1 family							DnaJ homolog subfamily B member 11; Serves as a co-chaperone for HSPA5. Binds directly to both unfolded proteins that are substrates for ERAD and nascent unfolded peptide chains, but dissociates from the HSPA5-unfolded protein complex before folding is completed. May help recruiting HSPA5 and other chaperones to the substrate. Stimulates HSPA5 ATPase activity; DNAJ heat shock proteins
KNG1	NA	9606.ENSP00000265023	10.5	15.15±9.26	KNG1	Kininogen-1; (1) Kininogens are inhibitors of thiol proteases; (2) HMW-kininogen plays an important role in blood coagulation by helping to position optimally prekallikrein and factor XI next to factor XII; (3) HMW-kininogen inhibits the thrombin- and plasmin- induced aggregation of thrombocytes; (4) the active peptide bradykinin that is released from HMW-kininogen shows a variety of physiologica…							Deoxyribonuclease 1 like 1; Belongs to the DNase I family
PDCD6IP	NA	9606.ENSP00000411825	10.5	16.03±9.28	PDCD6IP	Programmed cell death 6-interacting protein; Multifunctional protein involved in endocytosis, multivesicular body biogenesis, membrane repair, cytokinesis, apoptosis and maintenance of tight junction integrity. Class E VPS protein involved in concentration and sorting of cargo proteins of the multivesicular body (MVB) for incorporation into intralumenal vesicles (ILVs) that are generated by invag…							Destrin; Actin-depolymerizing protein. Severs actin filaments (F- actin) and binds to actin monomers (G-actin). Acts in a pH- independent manner
PPIA	NA	9606.ENSP00000419425	10.5	14.02±2.88	PPIA	Peptidyl-prolyl cis-trans isomerase A; PPIases accelerate the folding of proteins. It catalyzes the cis-trans isomerization of proline imidic peptide bonds in oligopeptides; Belongs to the cyclophilin-type PPIase family. PPIase A subfamily							Elongation factor 1-alpha 1; This protein promotes the GTP-dependent binding of aminoacyl-tRNA to the A-site of ribosomes during protein biosynthesis. With PARP1 and TXK, forms a complex that acts as a T helper 1 (Th1) cell-specific transcription factor and binds the promoter of IFN-gamma to directly regulate its transcription, and is thus involved importantly in Th1 cytokine production; Belongs …
PRSS37	9739.XP_004323004.1	9606.ENSP00000297767	10.5	19.07±4.05	PRSS37	Probable inactive serine protease 37; Plays a role in male fertility (By similarity). May have a role in sperm migration or binding to zona-intact eggs (By similarity). Involved in the activation of the proacrosin/acrosin system; Belongs to the peptidase S1 family							Elongation factor 1-gamma; Probably plays a role in anchoring the complex to other cellular components
PRSS55	9739.XP_004316439.1	9606.ENSP00000333003	10.5	16.69±6.49	PRSS55	Serine protease 55; Probable serine protease							Elongation factor 2; Catalyzes the GTP-dependent ribosomal translocation step during translation elongation. During this step, the ribosome changes from the pre-translocational (PRE) to the post- translocational (POST) state as the newly formed A-site-bound peptidyl-tRNA and P-site-bound deacylated tRNA move to the P and E sites, respectively. Catalyzes the coordinated movement of the two tRNA mo…
VAPA	9739.XP_004318626.1	9606.ENSP00000345656	10.5	13.91±7.41	VAPA	Vesicle-associated membrane protein-associated protein A; VAMP associated protein A							EH domain-containing protein 1; ATP- and membrane-binding protein that controls membrane reorganization/tubulation upon ATP hydrolysis. In vitro causes vesiculation of endocytic membranes. Acts in early endocytic membrane fusion and membrane trafficking of recycling endosomes. Recruited to endosomal membranes upon nerve growth factor stimulation, indirectly regulates neurite outgrowth (By similar…
CLU	NA	9606.ENSP00000315130	10	16.71±10.07	CLU	Clusterin; Isoform 1 functions as extracellular chaperone that prevents aggregation of nonnative proteins. Prevents stress- induced aggregation of blood plasma proteins. Inhibits formation of amyloid fibrils by APP, APOC2, B2M, CALCA, CSN3, SNCA and aggregation-prone LYZ variants (in vitro). Does not require ATP. Maintains partially unfolded proteins in a state appropriate for subsequent refoldin…							Alpha-enolase; Multifunctional enzyme that, as well as its role in glycolysis, plays a part in various processes such as growth control, hypoxia tolerance and allergic responses. May also function in the intravascular and pericellular fibrinolytic system due to its ability to serve as a receptor and activator of plasminogen on the cell surface of several cell-types such as leukocytes and neurons.…
EEF2	NA	9606.ENSP00000307940	10	17.29±3.84	EEF2	Elongation factor 2; Catalyzes the GTP-dependent ribosomal translocation step during translation elongation. During this step, the ribosome changes from the pre-translocational (PRE) to the post- translocational (POST) state as the newly formed A-site-bound peptidyl-tRNA and P-site-bound deacylated tRNA move to the P and E sites, respectively. Catalyzes the coordinated movement of the two tRNA mo…							Ectonucleoside triphosphate diphosphohydrolase 5; Uridine diphosphatase (UDPase) that promotes protein N- glycosylation and ATP level regulation. UDP hydrolysis promotes protein N-glycosylation and folding in the endoplasmic reticulum, as well as elevated ATP consumption in the cytosol via an ATP hydrolysis cycle. Together with CMPK1 and AK1, constitutes an ATP hydrolysis cycle that converts ATP …
KPNB1	9739.XP_004311585.1	9606.ENSP00000290158	10	18.51±5.89	KPNB1	Importin subunit beta-1; Functions in nuclear protein import, either in association with an adapter protein, like an importin-alpha subunit, which binds to nuclear localization signals (NLS) in cargo substrates, or by acting as autonomous nuclear transport receptor. Acting autonomously, serves itself as NLS receptor. Docking of the importin/substrate complex to the nuclear pore complex (NPC) is m…							Syncytin-1; This endogenous retroviral envelope protein has retained its original fusogenic properties and participates in trophoblast fusion and the formation of a syncytium during placenta morphogenesis. May induce fusion through binding of SLC1A4 and SLC1A5
SLC2A3	NA	9606.ENSP00000075120	10	16.12±2.93	SLC2A3	Solute carrier family 2, facilitated glucose transporter member 3; Facilitative glucose transporter that can also mediate the uptake of various other monosaccharides across the cell membrane. Mediates the uptake of glucose, 2-deoxyglucose, galactose, mannose, xylose and fucose, and probably also dehydroascorbate. Does not mediate fructose transport; Belongs to the major facilitator superfamily. S…							ERO1-like protein beta; Oxidoreductase involved in disulfide bond formation in the endoplasmic reticulum. Efficiently reoxidizes P4HB/PDI, the enzyme catalyzing protein disulfide formation, in order to allow P4HB to sustain additional rounds of disulfide formation. Other protein disulfide isomerase family members can also be reoxidized, but at lower rates compared to P4HB, including PDIA2 (50% of…
VDAC2	9739.XP_004317128.1	9606.ENSP00000361635	10	14.46±2.02	VDAC2	Voltage-dependent anion-selective channel protein 2; Forms a channel through the mitochondrial outer membrane that allows diffusion of small hydrophilic molecules. The channel adopts an open conformation at low or zero membrane potential and a closed conformation at potentials above 30-40 mV. The open state has a weak anion selectivity whereas the closed state is cation- selective; Belongs to the…							Endoplasmic reticulum resident protein 29; Does not seem to be a disulfide isomerase. Plays an important role in the processing of secretory proteins within the endoplasmic reticulum (ER), possibly by participating in the folding of proteins in the ER
PEBP1	NA	9606.ENSP00000261313	9.75	16.65±7.23	PEBP1	Phosphatidylethanolamine-binding protein 1; Binds ATP, opioids and phosphatidylethanolamine. Has lower affinity for phosphatidylinositol and phosphatidylcholine. Serine protease inhibitor which inhibits thrombin, neuropsin and chymotrypsin but not trypsin, tissue type plasminogen activator and elastase (By similarity). Inhibits the kinase activity of RAF1 by inhibiting its activation and by disso…							Endoplasmic reticulum resident protein 44; Mediates thiol-dependent retention in the early secretory pathway, forming mixed disulfides with substrate proteins through its conserved CRFS motif. Inhibits the calcium channel activity of ITPR1. May have a role in the control of oxidative protein folding in the endoplasmic reticulum. Required to retain ERO1A and ERO1B in the endoplasmic reticulum
PRKAR1A	9739.XP_004319072.1	9606.ENSP00000376475	9.75	19.31±11.35	PRKAR1A	cAMP-dependent protein kinase type I-alpha regulatory subunit; Regulatory subunit of the cAMP-dependent protein kinases involved in cAMP signaling in cells							S-formylglutathione hydrolase; Serine hydrolase involved in the detoxification of formaldehyde
ARSA	9739.XP_004314555.1	9606.ENSP00000216124	9.67	16.33±2.08	ARSA	Arylsulfatase A; Hydrolyzes cerebroside sulfate; Belongs to the sulfatase family							Fatty-acid amide hydrolase 1; Degrades bioactive fatty acid amides like oleamide, the endogenous cannabinoid, anandamide and myristic amide to their corresponding acids, thereby serving to terminate the signaling functions of these molecules. Hydrolyzes polyunsaturated substrate anandamide preferentially as compared to monounsaturated substrates
CCT4	NA	9606.ENSP00000377958	9.5	12.67±8.74	CCT4	T-complex protein 1 subunit delta; Molecular chaperone; assists the folding of proteins upon ATP hydrolysis. As part of the BBS/CCT complex may play a role in the assembly of BBSome, a complex involved in ciliogenesis regulating transports vesicles to the cilia. Known to play a role, in vitro, in the folding of actin and tubulin; Chaperonins							Reticulophagy regulator 1; Endoplasmic reticulum-anchored autophagy receptor that mediates ER delivery into lysosomes through sequestration into autophagosomes. Promotes membrane remodeling and ER scission via its membrane bending capacity and targets the fragments into autophagosomes via interaction with ATG8 family proteins. Required for long-term survival of nociceptive and autonomic ganglion …
RAB18	NA	9606.ENSP00000478479	9.5	17.75±5.18	RAB18	Ras-related protein Rab-18; RAB18, member RAS oncogene family							Protein FAM3C; May be involved in retinal laminar formation. Promotes epithelial to mesenchymal transition
RPN2	9739.XP_004313958.1	9606.ENSP00000237530	9.25	15.51±3.05	RPN2	Dolichyl-diphosphooligosaccharide--protein glycosyltransferase subunit 2; Essential subunit of the N-oligosaccharyl transferase (OST) complex which catalyzes the transfer of a high mannose oligosaccharide from a lipid-linked oligosaccharide donor to an asparagine residue within an Asn-X-Ser/Thr consensus motif in nascent polypeptide chains; Belongs to the SWP1 family							Fc fragment of IgG binding protein
TXNDC12	9739.XP_004311962.1	9606.ENSP00000360688	9.25	7.85±4.11	TXNDC12	Thioredoxin domain-containing protein 12; Possesses significant protein thiol-disulfide oxidase activity							Fetuin-B; Protease inhibitor required for egg fertilization. Required to prevent premature zona pellucida hardening before fertilization, probably by inhibiting the protease activity of ASTL, a protease that mediates the cleavage of ZP2 and triggers zona pellucida hardening (By similarity); Belongs to the fetuin family
ATL3	9739.XP_004318358.1	9606.ENSP00000381844	9	13.08±7.4	ATL3	Atlastin-3; GTPase tethering membranes through formation of trans- homooligomers and mediating homotypic fusion of endoplasmic reticulum membranes. Functions in endoplasmic reticulum tubular network biogenesis							Folate receptor gamma; Binds to folate and reduced folic acid derivatives and mediates delivery of 5-methyltetrahydrofolate to the interior of cells. Isoform Short does not bind folate
CCT6A	9739.XP_004327025.1	9606.ENSP00000275603	9	14.79±6.27	CCT6A	T-complex protein 1 subunit zeta; Molecular chaperone; assists the folding of proteins upon ATP hydrolysis. Known to play a role, in vitro, in the folding of actin and tubulin; Belongs to the TCP-1 chaperonin family							Ferritin heavy chain; Stores iron in a soluble, non-toxic, readily available form. Important for iron homeostasis. Has ferroxidase activity. Iron is taken up in the ferrous form and deposited as ferric hydroxides after oxidation. Also plays a role in delivery of iron to cells. Mediates iron uptake in capsule cells of the developing kidney (By similarity); Belongs to the ferritin family
DEFB128	9739.XP_004326798.1	9606.ENSP00000335382	9	10.78±2.87	DEFB128	Beta-defensin 128; Has antibacterial activity; Defensins, beta							Tissue alpha-L-fucosidase; Alpha-L-fucosidase is responsible for hydrolyzing the alpha-1,6-linked fucose joined to the reducing-end N- acetylglucosamine of the carbohydrate moieties of glycoproteins
HPX	NA	9606.ENSP00000265983	9	15.35±4.98	HPX	Hemopexin; Binds heme and transports it to the liver for breakdown and iron recovery, after which the free hemopexin returns to the circulation							Lysosomal alpha-glucosidase; Essential for the degradation of glycogen in lysosomes. Has highest activity on alpha-1,4-linked glycosidic linkages, but can also hydrolyze alpha-1,6-linked glucans
ANPEP	9739.XP_004312977.1	9606.ENSP00000300060	8.75	14.5±4.19	ANPEP	Aminopeptidase N; Broad specificity aminopeptidase which plays a role in the final digestion of peptides generated from hydrolysis of proteins by gastric and pancreatic proteases. Also involved in the processing of various peptides including peptide hormones, such as angiotensin III and IV, neuropeptides, and chemokines. May also be involved the cleavage of peptides bound to major histocompatibil…							Neutral alpha-glucosidase AB; Cleaves sequentially the 2 innermost alpha-1,3-linked glucose residues from the Glc(2)Man(9)GlcNAc(2) oligosaccharide precursor of immature glycoproteins. Required for PKD1/Polycystin-1 and PKD2/Polycystin-2 maturation and localization to the cell surface and cilia; Belongs to the glycosyl hydrolase 31 family
ASAH1	NA	9606.ENSP00000371152	8.75	14.66±1.29	ASAH1	Acid ceramidase; Hydrolyzes the sphingolipid ceramide into sphingosine and free fatty acid							Glyceraldehyde-3-phosphate dehydrogenase; Has both glyceraldehyde-3-phosphate dehydrogenase and nitrosylase activities, thereby playing a role in glycolysis and nuclear functions, respectively. Participates in nuclear events including transcription, RNA transport, DNA replication and apoptosis. Nuclear functions are probably due to the nitrosylase activity that mediates cysteine S-nitrosylation o…
CALM1	9739.XP_004313180.1	9606.ENSP00000349467	8.67	2.73±1.11	CALM1	Calmodulin-1; Calmodulin mediates the control of a large number of enzymes, ion channels, aquaporins and other proteins through calcium-binding. Among the enzymes to be stimulated by the calmodulin-calcium complex are a number of protein kinases and phosphatases. Together with CCP110 and centrin, is involved in a genetic pathway that regulates the centrosome cycle and progression through cytokine…							Rab GDP dissociation inhibitor beta; Regulates the GDP/GTP exchange reaction of most Rab proteins by inhibiting the dissociation of GDP from them, and the subsequent binding of GTP to them
SOD1	NA	9606.ENSP00000270142	8.5	11.46±3.96	SOD1	Superoxide dismutase [Cu-Zn]; Destroys radicals which are normally produced within the cells and which are toxic to biological systems							Gamma-glutamyl hydrolase; Hydrolyzes the polyglutamate sidechains of pteroylpolyglutamates. Progressively removes gamma-glutamyl residues from pteroylpoly-gamma-glutamate to yield pteroyl-alpha- glutamate (folic acid) and free glutamate. May play an important role in the bioavailability of dietary pteroylpolyglutamates and in the metabolism of pteroylpolyglutamates and antifolates; Belongs to the…
PRKACB	NA	9606.ENSP00000359719	8.25	12.6±4.88	PRKACB	cAMP-dependent protein kinase catalytic subunit beta; Mediates cAMP-dependent signaling triggered by receptor binding to GPCRs. PKA activation regulates diverse cellular processes such as cell proliferation, the cell cycle, differentiation and regulation of microtubule dynamics, chromatin condensation and decondensation, nuclear envelope disassembly and reassembly, as well as regulation of intrac…							Glutathione hydrolase 1 proenzyme; Cleaves the gamma-glutamyl bond of extracellular glutathione (gamma-Glu-Cys-Gly), glutathione conjugates, and other gamma-glutamyl compounds. The metabolism of glutathione releases free glutamate and the dipeptide cysteinyl-glycine, which is hydrolyzed to cysteine and glycine by dipeptidases. In the presence of high concentrations of dipeptides and some amino ac…
RAB1A	9739.XP_004325570.1	9606.ENSP00000387286	8.25	15.11±4.26	RAB1A	Ras-related protein Rab-1A; The small GTPases Rab are key regulators of intracellular membrane trafficking, from the formation of transport vesicles to their fusion with membranes. Rabs cycle between an inactive GDP-bound form and an active GTP-bound form that is able to recruit to membranes different sets of downstream effectors directly responsible for vesicle formation, movement, tethering and…							Beta-galactosidase; Cleaves beta-linked terminal galactosyl residues from gangliosides, glycoproteins, and glycosaminoglycans; Belongs to the glycosyl hydrolase 35 family
TEX101	9739.XP_004321837.1	9606.ENSP00000472308	8.25	12.8±0.98	TEX101	Testis-expressed protein 101; Plays a role in fertilization by controlling binding of sperm to zona pellucida and migration of spermatozoa into the oviduct (By similarity). May play a role in signal transduction and promote protein tyrosine phosphorylation (By similarity); LY6/PLAUR domain containing							Golgi apparatus protein 1; Binds fibroblast growth factor and E-selectin (cell- adhesion lectin on endothelial cells mediating the binding of neutrophils)
TKT	NA	9606.ENSP00000391481	8.25	14.47±6.63	TKT	Transketolase; Catalyzes the transfer of a two-carbon ketol group from a ketose donor to an aldose acceptor, via a covalent intermediate with the cofactor thiamine pyrophosphate; Belongs to the transketolase family							Glyoxalase domain containing 4
CAND1	NA	9606.ENSP00000442318	7.75	11.57±6.81	CAND1	Cullin-associated NEDD8-dissociated protein 1; Key assembly factor of SCF (SKP1-CUL1-F-box protein) E3 ubiquitin ligase complexes that promotes the exchange of the substrate-recognition F-box subunit in SCF complexes, thereby playing a key role in the cellular repertoire of SCF complexes. Acts as a F-box protein exchange factor. The exchange activity of CAND1 is coupled with cycles of neddylation…							Glycosyltransferase 8 domain containing 1; Belongs to the glycosyltransferase 8 family
CCT2	9739.XP_004323987.1	9606.ENSP00000299300	7.75	11.88±5.16	CCT2	T-complex protein 1 subunit beta; Molecular chaperone; assists the folding of proteins upon ATP hydrolysis. As part of the BBS/CCT complex may play a role in the assembly of BBSome, a complex involved in ciliogenesis regulating transports vesicles to the cilia. Known to play a role, in vitro, in the folding of actin and tubulin; Chaperonins							Glutamine synthetase; This enzyme has 2 functions: it catalyzes the production of glutamine and 4-aminobutanoate (gamma-aminobutyric acid, GABA), the latter in a pyridoxal phosphate-independent manner (By similarity). Essential for proliferation of fetal skin fibroblasts; Belongs to the glutamine synthetase family
DNAJB11	9739.XP_004318277.1	9606.ENSP00000414398	7.75	9.3±2.55	DNAJB11	DnaJ homolog subfamily B member 11; Serves as a co-chaperone for HSPA5. Binds directly to both unfolded proteins that are substrates for ERAD and nascent unfolded peptide chains, but dissociates from the HSPA5-unfolded protein complex before folding is completed. May help recruiting HSPA5 and other chaperones to the substrate. Stimulates HSPA5 ATPase activity; DNAJ heat shock proteins							Guanine nucleotide-binding protein G(I)/G(S)/G(T) subunit beta-1; Guanine nucleotide-binding proteins (G proteins) are involved as a modulator or transducer in various transmembrane signaling systems. The beta and gamma chains are required for the GTPase activity, for replacement of GDP by GTP, and for G protein- effector interaction
PARK7	9739.XP_004329587.1	9606.ENSP00000418770	7.75	14.65±6.33	PARK7	Protein/nucleic acid deglycase DJ-1; Protein and nucleotide deglycase that catalyzes the deglycation of the Maillard adducts formed between amino groups of proteins or nucleotides and reactive carbonyl groups of glyoxals. Thus, functions as a protein deglycase that repairs methylglyoxal- and glyoxal-glycated proteins, and releases repaired proteins and lactate or glycolate, respectively. Deglycat…							N-acetylglucosamine-6-sulfatase; Glucosamine-6-sulfatase; Belongs to the sulfatase family
GDI2	NA	9606.ENSP00000369538	7.5	12.39±4.47	GDI2	Rab GDP dissociation inhibitor beta; Regulates the GDP/GTP exchange reaction of most Rab proteins by inhibiting the dissociation of GDP from them, and the subsequent binding of GTP to them							Aspartate aminotransferase, cytoplasmic; Biosynthesis of L-glutamate from L-aspartate or L- cysteine. Important regulator of levels of glutamate, the major excitatory neurotransmitter of the vertebrate central nervous system. Acts as a scavenger of glutamate in brain neuroprotection. The aspartate aminotransferase activity is involved in hepatic glucose synthesis during development and in adipocy…
IMPA1	9739.XP_004315674.1	9606.ENSP00000408526	7.5	9.58±3.46	IMPA1	Inositol monophosphatase 1; Responsible for the provision of inositol required for synthesis of phosphatidylinositol and polyphosphoinositides and has been implicated as the pharmacological target for lithium action in brain. Has broad substrate specificity and can use myo- inositol monophosphates, myo-inositol 1,3-diphosphate, myo- inositol 1,4-diphosphate, scyllo-inositol-phosphate, D-galactose…							Glycerol-3-phosphate dehydrogenase 1-like protein; Plays a role in regulating cardiac sodium current; decreased enzymatic activity with resulting increased levels of glycerol 3-phosphate activating the DPD1L-dependent SCN5A phosphorylation pathway, may ultimately lead to decreased sodium current; cardiac sodium current may also be reduced due to alterations of NAD(H) balance induced by DPD1L
MANBA	NA	9606.ENSP00000226578	7.5	12.68±4.35	MANBA	Beta-mannosidase; Exoglycosidase that cleaves the single beta-linked mannose residue from the non-reducing end of all N-linked glycoprotein oligosaccharides; Mannosidases type beta							Glucose-6-phosphate isomerase; Besides it's role as a glycolytic enzyme, mammalian GPI can function as a tumor-secreted cytokine and an angiogenic factor (AMF) that stimulates endothelial cell motility. GPI is also a neurotrophic factor (Neuroleukin) for spinal and sensory neurons
AHCY	NA	9606.ENSP00000217426	7.25	11.88±5.93	AHCY	Adenosylhomocysteinase; Adenosylhomocysteine is a competitive inhibitor of S- adenosyl-L-methionine-dependent methyl transferase reactions; therefore adenosylhomocysteinase may play a key role in the control of methylations via regulation of the intracellular concentration of adenosylhomocysteine							Gelsolin; Calcium-regulated, actin-modulating protein that binds to the plus (or barbed) ends of actin monomers or filaments, preventing monomer exchange (end-blocking or capping). It can promote the assembly of monomers into filaments (nucleation) as well as sever filaments already formed. Plays a role in ciliogenesis; Gelsolin/villins
CD14	9739.XP_004322036.1	9606.ENSP00000304236	7.25	11.4±1.04	CD14	Monocyte differentiation antigen CD14; Coreceptor for bacterial lipopolysaccharide. In concert with LBP, binds to monomeric lipopolysaccharide and delivers it to the LY96/TLR4 complex, thereby mediating the innate immune response to bacterial lipopolysaccharide (LPS). Acts via MyD88, TIRAP and TRAF6, leading to NF-kappa-B activation, cytokine secretion and the inflammatory response. Acts as a cor…							Glutathione S-transferase Mu 3; Conjugation of reduced glutathione to a wide number of exogenous and endogenous hydrophobic electrophiles. May govern uptake and detoxification of both endogenous compounds and xenobiotics at the testis and brain blood barriers; Belongs to the GST superfamily. Mu family
LDHA	NA	9606.ENSP00000445175	7.25	12.44±4.04	LDHA	Lactate dehydrogenase A; Belongs to the LDH/MDH superfamily. LDH family							Beta-hexosaminidase subunit alpha; Responsible for the degradation of GM2 gangliosides, and a variety of other molecules containing terminal N-acetyl hexosamines, in the brain and other tissues. The form B is active against certain oligosaccharides. The form S has no measurable activity; Belongs to the glycosyl hydrolase 20 family
MME	NA	9606.ENSP00000418525	7.25	12.89±5.83	MME	Neprilysin; Thermolysin-like specificity, but is almost confined on acting on polypeptides of up to 30 amino acids. Biologically important in the destruction of opioid peptides such as Met- and Leu-enkephalins by cleavage of a Gly-Phe bond. Able to cleave angiotensin-1, angiotensin-2 and angiotensin 1-9. Involved in the degradation of atrial natriuretic factor (ANF). Displays UV-inducible elastas…							Beta-hexosaminidase subunit beta; Responsible for the degradation of GM2 gangliosides, and a variety of other molecules containing terminal N-acetyl hexosamines, in the brain and other tissues; Belongs to the glycosyl hydrolase 20 family
SLC16A7	9739.XP_004320574.1	9606.ENSP00000261187	7.25	10.06±3.88	SLC16A7	Monocarboxylate transporter 2; Proton-coupled monocarboxylate transporter. Catalyzes the rapid transport across the plasma membrane of many monocarboxylates such as lactate, pyruvate, branched-chain oxo acids derived from leucine, valine and isoleucine, and the ketone bodies acetoacetate, beta-hydroxybutyrate and acetate. Functions as high-affinity pyruvate transporter; Belongs to the major facil…							Hexokinase-1; Hexokinase 1
BSG	9739.XP_004314253.1	9606.ENSP00000333769	7	9.42±3.54	BSG	Basigin; Plays an important role in targeting the monocarboxylate transporters SLC16A1, SLC16A3, SLC16A8 and SLC16A11 to the plasma membrane. Plays pivotal roles in spermatogenesis, embryo implantation, neural network formation and tumor progression. Stimulates adjacent fibroblasts to produce matrix metalloproteinases (MMPS). Seems to be a receptor for oligomannosidic glycans. In vitro, promotes …							Heme oxygenase 2; Heme oxygenase cleaves the heme ring at the alpha methene bridge to form biliverdin. Biliverdin is subsequently converted to bilirubin by biliverdin reductase. Under physiological conditions, the activity of heme oxygenase is highest in the spleen, where senescent erythrocytes are sequestrated and destroyed. Heme oxygenase 2 could be implicated in the production of carbon monoxi…
CCT3	9739.XP_004321669.1	9606.ENSP00000295688	7	11.34±5.27	CCT3	T-complex protein 1 subunit gamma; Molecular chaperone; assists the folding of proteins upon ATP hydrolysis. As part of the BBS/CCT complex may play a role in the assembly of BBSome, a complex involved in ciliogenesis regulating transports vesicles to the cilia. Known to play a role, in vitro, in the folding of actin and tubulin; Chaperonins							Hemopexin; Binds heme and transports it to the liver for breakdown and iron recovery, after which the free hemopexin returns to the circulation
MDH1	NA	9606.ENSP00000438144	7	12.33±3.32	MDH1	Malate dehydrogenase, cytoplasmic; Malate dehydrogenase 1; Belongs to the LDH/MDH superfamily. MDH type 2 family							Very-long-chain 3-oxoacyl-CoA reductase; Catalyzes the second of the four reactions of the long- chain fatty acids elongation cycle. This endoplasmic reticulum- bound enzymatic process, allows the addition of two carbons to the chain of long- and very long-chain fatty acids/VLCFAs per cycle. This enzyme has a 3-ketoacyl-CoA reductase activity, reducing 3- ketoacyl-CoA to 3-hydroxyacyl-CoA, within…
RAB14	9739.XP_004314010.1	9606.ENSP00000362946	7	12.32±3.07	RAB14	Ras-related protein Rab-14; Involved in membrane trafficking between the Golgi complex and endosomes during early embryonic development. Regulates the Golgi to endosome transport of FGFR-containing vesicles during early development, a key process for developing basement membrane and epiblast and primitive endoderm lineages during early postimplantation development. May act by modulating the kines…							Heat shock protein HSP 90-alpha; Molecular chaperone that promotes the maturation, structural maintenance and proper regulation of specific target proteins involved for instance in cell cycle control and signal transduction. Undergoes a functional cycle that is linked to its ATPase activity which is essential for its chaperone activity. This cycle probably induces conformational changes in the cl…
CTSS	NA	9606.ENSP00000357981	6.75	10.13±3.58	CTSS	Cathepsin S; Thiol protease. Key protease responsible for the removal of the invariant chain from MHC class II molecules. The bond- specificity of this proteinase is in part similar to the specificities of cathepsin L and cathepsin N; Cathepsins							Endoplasmin; Molecular chaperone that functions in the processing and transport of secreted proteins. When associated with CNPY3, required for proper folding of Toll-like receptors (By similarity). Functions in endoplasmic reticulum associated degradation (ERAD). Has ATPase activity; Belongs to the heat shock protein 90 family
RAB1B	9739.XP_004318823.1	9606.ENSP00000310226	6.75	12.63±4.25	RAB1B	Ras-related protein Rab-1B; The small GTPases Rab are key regulators of intracellular membrane trafficking, from the formation of transport vesicles to their fusion with membranes. Rabs cycle between an inactive GDP-bound form and an active GTP-bound form that is able to recruit to membranes different set of downstream effectors directly responsible for vesicle formation, movement, tethering and …							Heat shock-related 70 kDa protein 2; Molecular chaperone implicated in a wide variety of cellular processes, including protection of the proteome from stress, folding and transport of newly synthesized polypeptides, activation of proteolysis of misfolded proteins and the formation and dissociation of protein complexes. Plays a pivotal role in the protein quality control system, ensuring the corre…
TXNDC5	9739.XP_004315387.1	9606.ENSP00000369081	6.75	13.09±2.73	TXNDC5	Thioredoxin domain-containing protein 5; Possesses thioredoxin activity. Has been shown to reduce insulin disulfide bonds. Also complements protein disulfide- isomerase deficiency in yeast (By similarity)							Heat shock 70 kDa protein 4L; Possesses chaperone activity in vitro where it inhibits aggregation of citrate synthase; Belongs to the heat shock protein 70 family
CCT5	9739.XP_004326156.1	9606.ENSP00000280326	6.5	10.74±4.33	CCT5	T-complex protein 1 subunit epsilon; Molecular chaperone; assists the folding of proteins upon ATP hydrolysis. As part of the BBS/CCT complex may play a role in the assembly of BBSome, a complex involved in ciliogenesis regulating transports vesicles to the cilia. Known to play a role, in vitro, in the folding of actin and tubulin; Chaperonins							78 kDa glucose-regulated protein; Plays a role in facilitating the assembly of multimeric protein complexes inside the endoplasmic reticulum. Involved in the correct folding of proteins and degradation of misfolded proteins via its interaction with DNAJC10, probably to facilitate the release of DNAJC10 from its substrate (By similarity); Belongs to the heat shock protein 70 family
CLGN	9739.XP_004316150.1	9606.ENSP00000326699	6.5	9.99±5.49	CLGN	Calmegin; Functions during spermatogenesis as a chaperone for a range of client proteins that are important for sperm adhesion onto the egg zona pellucida and for subsequent penetration of the zona pellucida. Required for normal sperm migration from the uterus into the oviduct. Required for normal male fertility. Binds calcium ions (By similarity)							Heat shock cognate 71 kDa protein; Molecular chaperone implicated in a wide variety of cellular processes, including protection of the proteome from stress, folding and transport of newly synthesized polypeptides, activation of proteolysis of misfolded proteins and the formation and dissociation of protein complexes. Plays a pivotal role in the protein quality control system, ensuring the correct…
CLTC	9739.XP_004325097.1	9606.ENSP00000479606	6.5	9.89±5.88	CLTC	Clathrin heavy chain 1; Clathrin is the major protein of the polyhedral coat of coated pits and vesicles. Two different adapter protein complexes link the clathrin lattice either to the plasma membrane or to the trans-Golgi network. Acts as component of the TACC3/ch- TOG/clathrin complex proposed to contribute to stabilization of kinetochore fibers of the mitotic spindle by acting as inter- micro…							Hypoxia up-regulated protein 1; Has a pivotal role in cytoprotective cellular mechanisms triggered by oxygen deprivation. May play a role as a molecular chaperone and participate in protein folding; Belongs to the heat shock protein 70 family
CPPED1	NA	9606.ENSP00000371193	6.5	11.43±3.85	CPPED1	Serine/threonine-protein phosphatase CPPED1; Protein phosphatase that dephosphorylates AKT family kinase specifically at 'Ser-473', blocking cell cycle progression and promoting cell apoptosis. May play an inhibitory role in glucose uptake by adipocytes; Belongs to the metallophosphoesterase superfamily. CPPED1 family							Insulin-like growth factor-binding protein 7; Binds IGF-I and IGF-II with a relatively low affinity. Stimulates prostacyclin (PGI2) production. Stimulates cell adhesion; I-set domain containing
DDOST	9739.XP_004310787.1	9606.ENSP00000399457	6.5	9.75±3.31	DDOST	Dolichyl-diphosphooligosaccharide--protein glycosyltransferase 48 kDa subunit; Essential subunit of the N-oligosaccharyl transferase (OST) complex which catalyzes the transfer of a high mannose oligosaccharide from a lipid-linked oligosaccharide donor to an asparagine residue within an Asn-X-Ser/Thr consensus motif in nascent polypeptide chains. Required for the assembly of both SST3A- and SS3B-c…							Immunoglobulin lambda like polypeptide 5; C1-set domain containing
MAP1LC3B	NA	9606.ENSP00000268607	6.5	11.22±3.23	MAP1LC3B	Microtubule-associated proteins 1A/1B light chain 3B; Ubiquitin-like modifier involved in formation of autophagosomal vacuoles (autophagosomes). Plays a role in mitophagy which contributes to regulate mitochondrial quantity and quality by eliminating the mitochondria to a basal level to fulfill cellular energy requirements and preventing excess ROS production. Whereas LC3s are involved in elongat…							Inositol monophosphatase 1; Responsible for the provision of inositol required for synthesis of phosphatidylinositol and polyphosphoinositides and has been implicated as the pharmacological target for lithium action in brain. Has broad substrate specificity and can use myo- inositol monophosphates, myo-inositol 1,3-diphosphate, myo- inositol 1,4-diphosphate, scyllo-inositol-phosphate, D-galactose…
RAN	9739.XP_004310534.1	9606.ENSP00000446215	6.5	11.86±3.47	RAN	GTP-binding nuclear protein Ran; GTPase involved in nucleocytoplasmic transport, participating both to the import and the export from the nucleus of proteins and RNAs. Switches between a cytoplasmic GDP- and a nuclear GTP-bound state by nucleotide exchange and GTP hydrolysis. Nuclear import receptors such as importin beta bind their substrates only in the absence of GTP-bound RAN and release them…							Importin-4; Functions in nuclear protein import as nuclear transport receptor. Serves as receptor for nuclear localization signals (NLS) in cargo substrates. Is thought to mediate docking of the importin/substrate complex to the nuclear pore complex (NPC) through binding to nucleoporin and the complex is subsequently translocated through the pore by an energy requiring, Ran- dependent mechanism. …
ROPN1	NA	9606.ENSP00000184183	6.5	12.18±3.73	ROPN1	Ropporin-1A; Important for male fertility. With ROPN1L, involved in fibrous sheath integrity and sperm motility, plays a role in PKA- dependent signaling processes required for spermatozoa capacitation; Belongs to the ropporin family							Importin-5; Functions in nuclear protein import as nuclear transport receptor. Serves as receptor for nuclear localization signals (NLS) in cargo substrates. Is thought to mediate docking of the importin/substrate complex to the nuclear pore complex (NPC) through binding to nucleoporin and the complex is subsequently translocated through the pore by an energy requiring, Ran- dependent mechanism. …
SPPL2C	9739.XP_004318933.1	9606.ENSP00000332488	6.5	11.17±1.02	SPPL2C	Signal peptide peptidase-like 2C; Intramembrane-cleaving aspartic protease (I-CLiP) that may be able to cleave type II membrane signal peptides in the hydrophobic plane of the membrane							Importin-7; Functions in nuclear protein import, either by acting as autonomous nuclear transport receptor or as an adapter-like protein in association with the importin-beta subunit KPNB1. Acting autonomously, is thought to serve itself as receptor for nuclear localization signals (NLS) and to promote translocation of import substrates through the nuclear pore complex (NPC) by an energy requirin…
TCP1	9739.XP_004319756.1	9606.ENSP00000317334	6.5	11.5±6.21	TCP1	T-complex protein 1 subunit alpha; Molecular chaperone; assists the folding of proteins upon ATP hydrolysis. As part of the BBS/CCT complex may play a role in the assembly of BBSome, a complex involved in ciliogenesis regulating transports vesicles to the cilia. Known to play a role, in vitro, in the folding of actin and tubulin; Belongs to the TCP-1 chaperonin family							Immunoglobulin J chain; Serves to link two monomer units of either IgM or IgA. In the case of IgM, the J chain-joined dimer is a nucleating unit for the IgM pentamer, and in the case of IgA it induces larger polymers. It also help to bind these immunoglobulins to secretory component
ARF4	NA	9606.ENSP00000306010	6.33	8.96±0.59	ARF4	ADP-ribosylation factor 4; GTP-binding protein that functions as an allosteric activator of the cholera toxin catalytic subunit, an ADP- ribosyltransferase. Involved in protein trafficking; may modulate vesicle budding and uncoating within the Golgi apparatus; ARF GTPase family							Kallikrein-6; Serine protease which exhibits a preference for Arg over Lys in the substrate P1 position and for Ser or Pro in the P2 position. Shows activity against amyloid precursor protein, myelin basic protein, gelatin, casein and extracellular matrix proteins such as fibronectin, laminin, vitronectin and collagen. Degrades alpha-synuclein and prevents its polymerization, indicating that it m…
SOD3	NA	9606.ENSP00000371554	6.33	9.06±2.29	SOD3	Extracellular superoxide dismutase [Cu-Zn]; Protect the extracellular space from toxic effect of reactive oxygen intermediates by converting superoxide radicals into hydrogen peroxide and oxygen							Kininogen-1; (1) Kininogens are inhibitors of thiol proteases; (2) HMW-kininogen plays an important role in blood coagulation by helping to position optimally prekallikrein and factor XI next to factor XII; (3) HMW-kininogen inhibits the thrombin- and plasmin- induced aggregation of thrombocytes; (4) the active peptide bradykinin that is released from HMW-kininogen shows a variety of physiologica…
ATP1A1	9739.XP_004319901.1	9606.ENSP00000445306	6.25	11.36±4.55	ATP1A1	Sodium/potassium-transporting ATPase subunit alpha-1; This is the catalytic component of the active enzyme, which catalyzes the hydrolysis of ATP coupled with the exchange of sodium and potassium ions across the plasma membrane. This action creates the electrochemical gradient of sodium and potassium ions, providing the energy for active transport of various nutrients; ATPase Na+/K+ transporting …							Importin subunit beta-1; Functions in nuclear protein import, either in association with an adapter protein, like an importin-alpha subunit, which binds to nuclear localization signals (NLS) in cargo substrates, or by acting as autonomous nuclear transport receptor. Acting autonomously, serves itself as NLS receptor. Docking of the importin/substrate complex to the nuclear pore complex (NPC) is m…
BCAP29	9739.XP_004322940.1	9606.ENSP00000368414	6.25	10.99±3.12	BCAP29	B-cell receptor-associated protein 29; May play a role in anterograde transport of membrane proteins from the endoplasmic reticulum to the Golgi. May be involved in CASP8-mediated apoptosis (By similarity); Belongs to the BCAP29/BCAP31 family							Keratin, type II cytoskeletal 1; May regulate the activity of kinases such as PKC and SRC via binding to integrin beta-1 (ITB1) and the receptor of activated protein C kinase 1 (RACK1). In complex with C1QBP is a high affinity receptor for kininogen-1/HMWK; Keratins, type II
CTSL	NA	9606.ENSP00000345344	6.25	7.65±3.97	CTSL	Cathepsin L1; Important for the overall degradation of proteins in lysosomes; Cathepsins							Keratin, type I cytoskeletal 10; Keratins, type I
CUL3	9739.XP_004313670.1	9606.ENSP00000264414	6.25	10.39±6.24	CUL3	Cullin-3; Core component of multiple cullin-RING-based BCR (BTB- CUL3-RBX1) E3 ubiquitin-protein ligase complexes which mediate the ubiquitination and subsequent proteasomal degradation of target proteins. BCR complexes and ARIH1 collaborate in tandem to mediate ubiquitination of target proteins. As a scaffold protein may contribute to catalysis through positioning of the substrate and the ubiqui…							Keratin, type II cytoskeletal 2 epidermal; Probably contributes to terminal cornification. Associated with keratinocyte activation, proliferation and keratinization; Keratins, type II
NPEPPS	9739.XP_004311584.1	9606.ENSP00000320324	6.25	9.88±3.9	NPEPPS	Puromycin-sensitive aminopeptidase; Aminopeptidase with broad substrate specificity for several peptides. Involved in proteolytic events essential for cell growth and viability. May act as regulator of neuropeptide activity. Plays a role in the antigen-processing pathway for MHC class I molecules. Involved in the N-terminal trimming of cytotoxic T-cell epitope precursors. Digests the poly-Q pepti…							Keratin, type I cytoskeletal 9; May serve an important special function either in the mature palmar and plantar skin tissue or in the morphogenetic program of the formation of these tissues. Plays a role in keratin filament assembly; Belongs to the intermediate filament family
CAP1	NA	9606.ENSP00000361883	6	9.08±4.93	CAP1	Adenylyl cyclase-associated protein 1; Directly regulates filament dynamics and has been implicated in a number of complex developmental and morphological processes, including mRNA localization and the establishment of cell polarity; Belongs to the CAP family							Lysosome-associated membrane glycoprotein 1; Presents carbohydrate ligands to selectins. Also implicated in tumor cell metastasis; CD molecules
DIABLO	9739.XP_004312794.1	9606.ENSP00000398495	6	7.8±4.28	DIABLO	Diablo homolog, mitochondrial; Promotes apoptosis by activating caspases in the cytochrome c/Apaf-1/caspase-9 pathway. Acts by opposing the inhibitory activity of inhibitor of apoptosis proteins (IAP). Inhibits the activity of BIRC6/bruce by inhibiting its binding to caspases. Isoform 3 attenuates the stability and apoptosis- inhibiting activity of XIAP/BIRC4 by promoting XIAP/BIRC4 ubiquitinatio…							Neutrophil gelatinase-associated lipocalin; Iron-trafficking protein involved in multiple processes such as apoptosis, innate immunity and renal development. Binds iron through association with 2,5-dihydroxybenzoic acid (2,5- DHBA), a siderophore that shares structural similarities with bacterial enterobactin, and delivers or removes iron from the cell, depending on the context. Iron-bound form (…
EEF1G	9739.XP_004321433.1	9606.ENSP00000331901	6	10.34±2.69	EEF1G	Elongation factor 1-gamma; Probably plays a role in anchoring the complex to other cellular components							Epididymal-specific lipocalin-6; May play a role in male fertility; Lipocalins
ERO1B	NA	9606.ENSP00000346635	6	7.06±4	ERO1LB	ERO1-like protein beta; Oxidoreductase involved in disulfide bond formation in the endoplasmic reticulum. Efficiently reoxidizes P4HB/PDI, the enzyme catalyzing protein disulfide formation, in order to allow P4HB to sustain additional rounds of disulfide formation. Other protein disulfide isomerase family members can also be reoxidized, but at lower rates compared to P4HB, including PDIA2 (50% of…							Lactate dehydrogenase A; Belongs to the LDH/MDH superfamily. LDH family
ERP29	NA	9606.ENSP00000261735	6	11.44±4.66	ERP29	Endoplasmic reticulum resident protein 29; Does not seem to be a disulfide isomerase. Plays an important role in the processing of secretory proteins within the endoplasmic reticulum (ER), possibly by participating in the folding of proteins in the ER							Lactate dehydrogenase B; Belongs to the LDH/MDH superfamily. LDH family
FAM3C	9739.XP_004318441.1	9606.ENSP00000353025	6	6.32±2.98	FAM3C	Protein FAM3C; May be involved in retinal laminar formation. Promotes epithelial to mesenchymal transition							Protein LEG1 homolog; May be involved in early liver development
SPAG4	9739.XP_004319159.1	9606.ENSP00000363391	6	8.5±4.44	SPAG4	Sperm-associated antigen 4 protein; Involved in spermatogenesis. Required for sperm head formation but not required to establish and maintain general polarity of the sperm head. Required for anchoring and organization of the manchette. Required for targeting of SUN3 and probably SYNE1 through a probable SUN1:SYNE3 LINC complex to the nuclear envelope and involved in accurate posterior sperm head …							Galectin-3-binding protein; Promotes integrin-mediated cell adhesion. May stimulate host defense against viruses and tumor cells; BTB domain containing
DBI	NA	9606.ENSP00000439012	5.75	10.16±3.86	DBI	Acyl-CoA-binding protein; Binds medium- and long-chain acyl-CoA esters with very high affinity and may function as an intracellular carrier of acyl-CoA esters. It is also able to displace diazepam from the benzodiazepine (BZD) recognition site located on the GABA type A receptor. It is therefore possible that this protein also acts as a neuropeptide to modulate the action of the GABA receptor							Phospholysine phosphohistidine inorganic pyrophosphate phosphatase; Phosphatase that hydrolyzes imidodiphosphate, 3- phosphohistidine and 6-phospholysine. Has broad substrate specificity and can also hydrolyze inorganic diphosphate, but with lower efficiency (By similarity); Belongs to the HAD-like hydrolase superfamily
IPO4	9739.XP_004311679.1	9606.ENSP00000346453	5.75	10.18±5.49	IPO4	Importin-4; Functions in nuclear protein import as nuclear transport receptor. Serves as receptor for nuclear localization signals (NLS) in cargo substrates. Is thought to mediate docking of the importin/substrate complex to the nuclear pore complex (NPC) through binding to nucleoporin and the complex is subsequently translocated through the pore by an energy requiring, Ran- dependent mechanism. …							Lysophospholipid acyltransferase LPCAT4; Displays acyl-CoA-dependent lysophospholipid acyltransferase activity with a subset of lysophospholipids as substrates; converts lysophosphatidylethanolamine to phosphatidylethanolamine, lysophosphatidylcholine to phosphatidycholine, 1-alkenyl-lysophatidylethanolamine to 1- alkenyl-phosphatidylethanolamine, lysophosphatidylglycerol and alkyl-lysophosphatid…
LAMP1	NA	9606.ENSP00000333298	5.75	10.08±3.02	LAMP1	Lysosome-associated membrane glycoprotein 1; Presents carbohydrate ligands to selectins. Also implicated in tumor cell metastasis; CD molecules							Leucine rich alpha-2-glycoprotein 1
PGK1	NA	9606.ENSP00000362413	5.75	10.07±5.3	PGK1	Phosphoglycerate kinase 1; In addition to its role as a glycolytic enzyme, it seems that PGK-1 acts as a polymerase alpha cofactor protein (primer recognition protein). May play a role in sperm motility							Latent-transforming growth factor beta-binding protein 2; May play an integral structural role in elastic-fiber architectural organization and/or assembly; Latent transforming growth factor beta binding proteins
SERPINB6	9739.XP_004322320.1	9606.ENSP00000484343	5.75	8.9±3.25	SERPINB6	Serpin B6; May be involved in the regulation of serine proteinases present in the brain or extravasated from the blood (By similarity). Inhibitor of cathepsin G, kallikrein-8 and thrombin. May play an important role in the inner ear in the protection against leakage of lysosomal content during stress and loss of this protection results in cell death and sensorineural hearing loss; Deafness associ…							Lactotransferrin; Lactoferroxins A, B and C have opioid antagonist activity. Lactoferroxin A shows preference for mu-receptors, while lactoferroxin B and C have somewhat higher degrees of preference for kappa-receptors than for mu-receptors; Transferrins
PRDX5	9739.XP_004314462.1	9606.ENSP00000265462	5.67	9.32±3.88	PRDX5	Peroxiredoxin-5, mitochondrial; Thiol-specific peroxidase that catalyzes the reduction of hydrogen peroxide and organic hydroperoxides to water and alcohols, respectively. Plays a role in cell protection against oxidative stress by detoxifying peroxides and as sensor of hydrogen peroxide-mediated signaling events; Belongs to the peroxiredoxin family. Prx5 subfamily							LY6/PLAUR domain containing 4
STOM	9739.XP_004325201.1	9606.ENSP00000286713	5.67	7.55±6.67	STOM	Erythrocyte band 7 integral membrane protein; Regulates ion channel activity and transmembrane ion transport. Regulates ASIC2 and ASIC3 channel activity; Belongs to the band 7/mec-2 family							Lysozyme C; Lysozymes have primarily a bacteriolytic function; those in tissues and body fluids are associated with the monocyte- macrophage system and enhance the activity of immunoagents; Lysozymes, c-type
ACSBG2	9739.XP_004317436.1	9606.ENSP00000465589	5.5	10.25±8.93	ACSBG2	Long-chain-fatty-acid--CoA ligase ACSBG2; Mediates activation of long-chain fatty acids for both synthesis of cellular lipids, and degradation via beta-oxidation. Able to activate long-chain fatty acids. Also able to activate very long-chain fatty acids; however, the relevance of such activity is unclear in vivo. Has increased ability to activate oleic and linoleic acid. May play a role in sperma…							Sperm acrosome membrane-associated protein 3; Sperm surface membrane protein that may be involved in sperm-egg plasma membrane adhesion and fusion during fertilization. It could be a potential receptor for the egg oligosaccharide residue N-acetylglucosamine, which is present in the extracellular matrix over the egg plasma membrane. The processed form has no detectable bacteriolytic activity in vi…
ADAM28	9739.XP_004326810.1	9606.ENSP00000265769	5.5	9.88±4.56	ADAM28	Disintegrin and metalloproteinase domain-containing protein 28; May play a role in the adhesive and proteolytic events that occur during lymphocyte emigration or may function in ectodomain shedding of lymphocyte surface target proteins, such as FASL and CD40L. May be involved in sperm maturation; ADAM metallopeptidase domain containing							Lysosomal alpha-mannosidase; Necessary for the catabolism of N-linked carbohydrates released during glycoprotein turnover. Cleaves all known types of alpha-mannosidic linkages; Belongs to the glycosyl hydrolase 38 family
CNDP2	9739.XP_004314737.1	9606.ENSP00000325548	5.5	10.8±5.38	CNDP2	Cytosolic non-specific dipeptidase; Hydrolyzes a variety of dipeptides including L-carnosine but has a strong preference for Cys-Gly. Acts as a functional tumor suppressor in gastric cancer via activation of the mitogen-activated protein kinase (MAPK) pathway. An elevated level of CNDP2 activates the p38 and JNK MAPK pathways to induce cell apoptosis, and a lower level of CNDP2 activates the ERK …							Beta-mannosidase; Exoglycosidase that cleaves the single beta-linked mannose residue from the non-reducing end of all N-linked glycoprotein oligosaccharides; Mannosidases type beta
FAM134B	9739.XP_004314110.1	9606.ENSP00000304642	5.5	7.75±3.1	FAM134B	Reticulophagy regulator 1; Endoplasmic reticulum-anchored autophagy receptor that mediates ER delivery into lysosomes through sequestration into autophagosomes. Promotes membrane remodeling and ER scission via its membrane bending capacity and targets the fragments into autophagosomes via interaction with ATG8 family proteins. Required for long-term survival of nociceptive and autonomic ganglion …							Mesencephalic astrocyte-derived neurotrophic factor; Selectively promotes the survival of dopaminergic neurons of the ventral mid-brain. Modulates GABAergic transmission to the dopaminergic neurons of the substantia nigra. Enhances spontaneous, as well as evoked, GABAergic inhibitory postsynaptic currents in dopaminergic neurons (By similarity). Inhibits cell proliferation and endoplasmic reticul…
GGH	9739.XP_004327416.1	9606.ENSP00000260118	5.5	9.24±2.72	GGH	Gamma-glutamyl hydrolase; Hydrolyzes the polyglutamate sidechains of pteroylpolyglutamates. Progressively removes gamma-glutamyl residues from pteroylpoly-gamma-glutamate to yield pteroyl-alpha- glutamate (folic acid) and free glutamate. May play an important role in the bioavailability of dietary pteroylpolyglutamates and in the metabolism of pteroylpolyglutamates and antifolates; Belongs to the…							Microtubule-associated proteins 1A/1B light chain 3B; Ubiquitin-like modifier involved in formation of autophagosomal vacuoles (autophagosomes). Plays a role in mitophagy which contributes to regulate mitochondrial quantity and quality by eliminating the mitochondria to a basal level to fulfill cellular energy requirements and preventing excess ROS production. Whereas LC3s are involved in elongat…
HEXA	9739.XP_004325899.1	9606.ENSP00000268097	5.5	8.3±4.98	HEXA	Beta-hexosaminidase subunit alpha; Responsible for the degradation of GM2 gangliosides, and a variety of other molecules containing terminal N-acetyl hexosamines, in the brain and other tissues. The form B is active against certain oligosaccharides. The form S has no measurable activity; Belongs to the glycosyl hydrolase 20 family							Malate dehydrogenase, cytoplasmic; Malate dehydrogenase 1; Belongs to the LDH/MDH superfamily. MDH type 2 family
PAM	9739.XP_004321239.1	9606.ENSP00000306100	5.5	6.57±1.09	PAM	Peptidyl-glycine alpha-amidating monooxygenase; Bifunctional enzyme that catalyzes 2 sequential steps in C-terminal alpha-amidation of peptides. The monooxygenase part produces an unstable peptidyl(2-hydroxyglycine) intermediate that is dismutated to glyoxylate and the corresponding desglycine peptide amide by the lyase part. C-terminal amidation of peptides such as neuropeptides is essential for…							Melanotransferrin; Involved in iron cellular uptake. Seems to be internalized and then recycled back to the cell membrane. Binds a single atom of iron per subunit. Could also bind zinc
VDAC3	9739.XP_004311754.1	9606.ENSP00000428845	5.5	9.44±5.19	VDAC3	Voltage-dependent anion-selective channel protein 3; Forms a channel through the mitochondrial outer membrane that allows diffusion of small hydrophilic molecules; Belongs to the eukaryotic mitochondrial porin family							Lactadherin; Plays an important role in the maintenance of intestinal epithelial homeostasis and the promotion of mucosal healing. Promotes VEGF-dependent neovascularization (By similarity). Contributes to phagocytic removal of apoptotic cells in many tissues. Specific ligand for the alpha-v/beta-3 and alpha-v/beta-5 receptors. Also binds to phosphatidylserine-enriched cell surfaces in a receptor…
ACR	9739.XP_004314561.1	9606.ENSP00000216139	5.33	8.77±4.23	ACR	Acrosin; Acrosin is the major protease of mammalian spermatozoa. It is a serine protease of trypsin-like cleavage specificity, it is synthesized in a zymogen form, proacrosin and stored in the acrosome; Belongs to the peptidase S1 family							Neprilysin; Thermolysin-like specificity, but is almost confined on acting on polypeptides of up to 30 amino acids. Biologically important in the destruction of opioid peptides such as Met- and Leu-enkephalins by cleavage of a Gly-Phe bond. Able to cleave angiotensin-1, angiotensin-2 and angiotensin 1-9. Involved in the degradation of atrial natriuretic factor (ANF). Displays UV-inducible elastas…
MAN2B1	9739.XP_004318895.1	9606.ENSP00000395473	5.33	9.7±2.86	MAN2B1	Lysosomal alpha-mannosidase; Necessary for the catabolism of N-linked carbohydrates released during glycoprotein turnover. Cleaves all known types of alpha-mannosidic linkages; Belongs to the glycosyl hydrolase 38 family							Mannose-6-phosphate isomerase; Involved in the synthesis of the GDP-mannose and dolichol-phosphate-mannose required for a number of critical mannosyl transfer reactions; Belongs to the mannose-6-phosphate isomerase type 1 family
CCT8	9739.XP_004321369.1	9606.ENSP00000286788	5.25	8.6±3.49	CCT8	T-complex protein 1 subunit theta; Molecular chaperone; assists the folding of proteins upon ATP hydrolysis. As part of the BBS/CCT complex may play a role in the assembly of BBSome, a complex involved in ciliogenesis regulating transports vesicles to the cilia. Known to play a role, in vitro, in the folding of actin and tubulin; Belongs to the TCP-1 chaperonin family							Myeloid associated differentiation marker; Belongs to the MAL family
PGD	9739.XP_004332557.1	9606.ENSP00000270776	5.25	6.27±3.67	PGD	6-phosphogluconate dehydrogenase, decarboxylating; Catalyzes the oxidative decarboxylation of 6- phosphogluconate to ribulose 5-phosphate and CO(2), with concomitant reduction of NADP to NADPH; Belongs to the 6-phosphogluconate dehydrogenase family							Nucleosome assembly protein 1-like 4; Acts as histone chaperone in nucleosome assembly; Belongs to the nucleosome assembly protein (NAP) family
RNASET2	9739.XP_004325499.1	9606.ENSP00000426455	5.25	8.11±4.41	RNASET2	Ribonuclease T2; Has ribonuclease activity, with higher activity at acidic pH. Probably is involved in lysosomal degradation of ribosomal RNA (By similarity). Probably plays a role in cellular RNA catabolism; Belongs to the RNase T2 family							Alpha-soluble NSF attachment protein; Required for vesicular transport between the endoplasmic reticulum and the Golgi apparatus (Probable). Together with GNA12 promotes CDH5 localization to plasma membrane; Belongs to the SNAP family
IGLL5	NA	9606.ENSP00000431254	5	9.51±1.91	IGLL5	Immunoglobulin lambda like polypeptide 5; C1-set domain containing							Next to BRCA1 gene 1 protein; Acts probably as a receptor for selective autophagosomal degradation of ubiquitinated targets; Zinc fingers ZZ-type
PLS3	9739.XP_004330000.1	9606.ENSP00000348163	5	8±6.32	PLS3	Plastin-3; Actin-bundling protein found in intestinal microvilli, hair cell stereocilia, and fibroblast filopodia. May play a role in the regulation of bone development; EF-hand domain containing							Nucleoside diphosphate kinase; Major role in the synthesis of nucleoside triphosphates other than ATP. Negatively regulates Rho activity by interacting with AKAP13/LBC. Acts as a transcriptional activator of the MYC gene; binds DNA non-specifically. Exhibits histidine protein kinase activity; NME/NM23 family
RNF133	9739.XP_004322017.1	9606.ENSP00000344489	5	7.82±4.94	RNF133	E3 ubiquitin-protein ligase RNF133; Has E3 ubiquitin-protein ligase activity; Ring finger proteins							Epididymal secretory protein E1; Intracellular cholesterol transporter which acts in concert with NPC1 and plays an important role in the egress of cholesterol from the endosomal/lysosomal compartment. Both NPC1 and NPC2 function as the cellular 'tag team duo' (TTD) to catalyze the mobilization of cholesterol within the multivesicular environment of the late endosome (LE) to effect egress through…
YWHAE	NA	9606.ENSP00000264335	5	8.12±2.63	YWHAE	14-3-3 protein epsilon; Adapter protein implicated in the regulation of a large spectrum of both general and specialized signaling pathways. Binds to a large number of partners, usually by recognition of a phosphoserine or phosphothreonine motif. Binding generally results in the modulation of the activity of the binding partner (By similarity). Positively regulates phosphorylated protein HSF1 nuc…							Puromycin-sensitive aminopeptidase; Aminopeptidase with broad substrate specificity for several peptides. Involved in proteolytic events essential for cell growth and viability. May act as regulator of neuropeptide activity. Plays a role in the antigen-processing pathway for MHC class I molecules. Involved in the N-terminal trimming of cytotoxic T-cell epitope precursors. Digests the poly-Q pepti…
LDHB	NA	9606.ENSP00000379386	4.75	8.31±4.13	LDHB	Lactate dehydrogenase B; Belongs to the LDH/MDH superfamily. LDH family							5'-nucleotidase domain containing 1
PCMT1	9739.XP_004316028.1	9606.ENSP00000356354	4.75	8.99±3.28	PCMT1	Protein-L-isoaspartate(D-aspartate) O-methyltransferase; Catalyzes the methyl esterification of L-isoaspartyl and D-aspartyl residues in peptides and proteins that result from spontaneous decomposition of normal L-aspartyl and L-asparaginyl residues. It plays a role in the repair and/or degradation of damaged proteins. Acts on EIF4EBP2, microtubule-associated protein 2, calreticulin, clathrin lig…							5'-nucleotidase; Hydrolyzes extracellular nucleotides into membrane permeable nucleosides. Exhibits AMP-, NAD-, and NMN-nucleosidase activities; Belongs to the 5'-nucleotidase family
QPCT	9739.XP_004314042.1	9606.ENSP00000344829	4.75	7.13±5.5	QPCT	Glutaminyl-peptide cyclotransferase; Responsible for the biosynthesis of pyroglutamyl peptides. Has a bias against acidic and tryptophan residues adjacent to the N-terminal glutaminyl residue and a lack of importance of chain length after the second residue. Also catalyzes N-terminal pyroglutamate formation. In vitro, catalyzes pyroglutamate formation of N-terminally truncated form of APP amyloid…							Protein disulfide-isomerase; This multifunctional protein catalyzes the formation, breakage and rearrangement of disulfide bonds. At the cell surface, seems to act as a reductase that cleaves disulfide bonds of proteins attached to the cell. May therefore cause structural modifications of exofacial proteins. Inside the cell, seems to form/rearrange disulfide bonds of nascent proteins. At high con…
TM9SF4	NA	9606.ENSP00000381104	4.75	9.61±1.96	TM9SF4	Transmembrane 9 superfamily member 4; Associates with proteins harboring glycine-rich transmembrane domains and ensures their efficient localization to the cell surface. Regulates the assembly and activity of V-ATPase in colon cancer cells via its interaction with V-type proton ATPase subunit H (ATP6V1H) and contributes to V-ATPase-mediated pH alterations in cancer cells which play an important r…							Peptidyl-glycine alpha-amidating monooxygenase; Bifunctional enzyme that catalyzes 2 sequential steps in C-terminal alpha-amidation of peptides. The monooxygenase part produces an unstable peptidyl(2-hydroxyglycine) intermediate that is dismutated to glyoxylate and the corresponding desglycine peptide amide by the lyase part. C-terminal amidation of peptides such as neuropeptides is essential for…
ALDOC	9739.XP_004314068.1	9606.ENSP00000226253	4.67	2.85±1.42	ALDOC	Aldolase, fructose-bisphosphate C							Protein/nucleic acid deglycase DJ-1; Protein and nucleotide deglycase that catalyzes the deglycation of the Maillard adducts formed between amino groups of proteins or nucleotides and reactive carbonyl groups of glyoxals. Thus, functions as a protein deglycase that repairs methylglyoxal- and glyoxal-glycated proteins, and releases repaired proteins and lactate or glycolate, respectively. Deglycat…
GGT1	9739.XP_004312968.1	9606.ENSP00000383232	4.67	8.96±2.04	GGT1	Glutathione hydrolase 1 proenzyme; Cleaves the gamma-glutamyl bond of extracellular glutathione (gamma-Glu-Cys-Gly), glutathione conjugates, and other gamma-glutamyl compounds. The metabolism of glutathione releases free glutamate and the dipeptide cysteinyl-glycine, which is hydrolyzed to cysteine and glycine by dipeptidases. In the presence of high concentrations of dipeptides and some amino ac…							Protein-L-isoaspartate(D-aspartate) O-methyltransferase; Catalyzes the methyl esterification of L-isoaspartyl and D-aspartyl residues in peptides and proteins that result from spontaneous decomposition of normal L-aspartyl and L-asparaginyl residues. It plays a role in the repair and/or degradation of damaged proteins. Acts on EIF4EBP2, microtubule-associated protein 2, calreticulin, clathrin lig…
GLG1	NA	9606.ENSP00000205061	4.67	7.47±2.56	GLG1	Golgi apparatus protein 1; Binds fibroblast growth factor and E-selectin (cell- adhesion lectin on endothelial cells mediating the binding of neutrophils)							Programmed cell death 6-interacting protein; Multifunctional protein involved in endocytosis, multivesicular body biogenesis, membrane repair, cytokinesis, apoptosis and maintenance of tight junction integrity. Class E VPS protein involved in concentration and sorting of cargo proteins of the multivesicular body (MVB) for incorporation into intralumenal vesicles (ILVs) that are generated by invag…
LTBP2	NA	9606.ENSP00000261978	4.67	7.83±2.01	LTBP2	Latent-transforming growth factor beta-binding protein 2; May play an integral structural role in elastic-fiber architectural organization and/or assembly; Latent transforming growth factor beta binding proteins							Protein disulfide-isomerase A3; Protein disulfide isomerase family A member 3; Belongs to the protein disulfide isomerase family
ANXA11	NA	9606.ENSP00000398610	4.5	8.52±4.45	ANXA11	Annexin A11; Binds specifically to calcyclin in a calcium-dependent manner (By similarity). Required for midbody formation and completion of the terminal phase of cytokinesis; Belongs to the annexin family							Protein disulfide-isomerase A4; Protein disulfide isomerase family A member 4; Belongs to the protein disulfide isomerase family
BTD	9739.XP_004321284.1	9606.ENSP00000400995	4.5	7.81±2.7	BTD	Biotinidase; Catalytic release of biotin from biocytin, the product of biotin-dependent carboxylases degradation							Protein disulfide-isomerase A6; May function as a chaperone that inhibits aggregation of misfolded proteins. Negatively regulates the unfolded protein response (UPR) through binding to UPR sensors such as ERN1, which in turn inactivates ERN1 signaling. May also regulate the UPR via the EIF2AK3 UPR sensor. Plays a role in platelet aggregation and activation by agonists such as convulxin, collagen …
DEFB130	NA	9606.ENSP00000382951	4.5	6.72±2.04	DEFB30	Defensin, beta 130; Antimicrobial host-defense peptide. Has an antiplasmodial activity							Protein disulfide-isomerase-like protein of the testis; Probable redox-inactive chaperone involved in spermatogenesis; Belongs to the protein disulfide isomerase family
NME2	9739.XP_004324160.1	9606.ENSP00000376889	4.5	7.84±2.04	NME2	Nucleoside diphosphate kinase; Major role in the synthesis of nucleoside triphosphates other than ATP. Negatively regulates Rho activity by interacting with AKAP13/LBC. Acts as a transcriptional activator of the MYC gene; binds DNA non-specifically. Exhibits histidine protein kinase activity; NME/NM23 family							Pyridoxal-dependent decarboxylase domain-containing protein 1; Pyridoxal dependent decarboxylase domain containing 1; Belongs to the group II decarboxylase family
SIAE	9739.XP_004321279.1	9606.ENSP00000263593	4.5	6.6±4.4	SIAE	Sialate O-acetylesterase; Catalyzes the removal of O-acetyl ester groups from position 9 of the parent sialic acid, N-acetylneuraminic acid							Phosphatidylethanolamine-binding protein 1; Binds ATP, opioids and phosphatidylethanolamine. Has lower affinity for phosphatidylinositol and phosphatidylcholine. Serine protease inhibitor which inhibits thrombin, neuropsin and chymotrypsin but not trypsin, tissue type plasminogen activator and elastase (By similarity). Inhibits the kinase activity of RAF1 by inhibiting its activation and by disso…
CCT7	9739.XP_004311627.1	9606.ENSP00000258091	4.25	8.09±3.01	CCT7	T-complex protein 1 subunit eta; Molecular chaperone; assists the folding of proteins upon ATP hydrolysis. Known to play a role, in vitro, in the folding of actin and tubulin (By similarity); Chaperonins							Phosphoglycerate mutase 1; Interconversion of 3- and 2-phosphoglycerate with 2,3- bisphosphoglycerate as the primer of the reaction. Can also catalyze the reaction of EC 5.4.2.4 (synthase), but with a reduced activity
ESD	9739.XP_004312584.1	9606.ENSP00000367992	4.25	6.67±4.08	ESD	S-formylglutathione hydrolase; Serine hydrolase involved in the detoxification of formaldehyde							6-phosphogluconate dehydrogenase, decarboxylating; Catalyzes the oxidative decarboxylation of 6- phosphogluconate to ribulose 5-phosphate and CO(2), with concomitant reduction of NADP to NADPH; Belongs to the 6-phosphogluconate dehydrogenase family
TM9SF3	9739.XP_004320666.1	9606.ENSP00000360184	4.25	7.54±2.53	TM9SF3	Transmembrane 9 superfamily member 3							Phosphoglycerate kinase 1; In addition to its role as a glycolytic enzyme, it seems that PGK-1 acts as a polymerase alpha cofactor protein (primer recognition protein). May play a role in sperm motility
TUBB4B	NA	9606.ENSP00000341289	4.25	8.11±1.33	TUBB4B	Tubulin beta-4B chain; Tubulin is the major constituent of microtubules. It binds two moles of GTP, one at an exchangeable site on the beta chain and one at a non-exchangeable site on the alpha chain; Belongs to the tubulin family							Glycerol-3-phosphate phosphatase; Glycerol-3-phosphate phosphatase hydrolyzing glycerol-3- phosphate into glycerol. Thereby, regulates the cellular levels of glycerol-3-phosphate a metabolic intermediate of glucose, lipid and energy metabolism. Was also shown to have a 2-phosphoglycolate phosphatase activity and a tyrosine-protein phosphatase activity. However, their physiological relevance is un…
WDR54	9739.XP_004326350.1	9606.ENSP00000006526	4.25	7.06±1.23	WDR54	WD repeat-containing protein 54; WD repeat domain containing							Polymeric immunoglobulin receptor; This receptor binds polymeric IgA and IgM at the basolateral surface of epithelial cells. The complex is then transported across the cell to be secreted at the apical surface. During this process a cleavage occurs that separates the extracellular (known as the secretory component) from the transmembrane segment; V-set domain containing
AK1	9739.XP_004313993.1	9606.ENSP00000362271	4	5.95±0.37	AK1	Adenylate kinase isoenzyme 1; Catalyzes the reversible transfer of the terminal phosphate group between ATP and AMP. Also displays broad nucleoside diphosphate kinase activity. Plays an important role in cellular energy homeostasis and in adenine nucleotide metabolism; Belongs to the adenylate kinase family. AK1 subfamily							Pyruvate kinase PKM; Glycolytic enzyme that catalyzes the transfer of a phosphoryl group from phosphoenolpyruvate (PEP) to ADP, generating ATP. Stimulates POU5F1-mediated transcriptional activation. Plays a general role in caspase independent cell death of tumor cells. The ratio between the highly active tetrameric form and nearly inactive dimeric form determines whether glucose carbons are chann…
APOA1	9739.XP_004316795.1	9606.ENSP00000236850	4	6.45±1.75	APOA1	Apolipoprotein A-I; Participates in the reverse transport of cholesterol from tissues to the liver for excretion by promoting cholesterol efflux from tissues and by acting as a cofactor for the lecithin cholesterol acyltransferase (LCAT). As part of the SPAP complex, activates spermatozoa motility; Apolipoproteins							Phospholipid phosphatase 1; Phosphatidic acid phosphatase type 2A
ERP44	9739.XP_004311165.1	9606.ENSP00000262455	4	5.94±3.36	ERP44	Endoplasmic reticulum resident protein 44; Mediates thiol-dependent retention in the early secretory pathway, forming mixed disulfides with substrate proteins through its conserved CRFS motif. Inhibits the calcium channel activity of ITPR1. May have a role in the control of oxidative protein folding in the endoplasmic reticulum. Required to retain ERO1A and ERO1B in the endoplasmic reticulum							Plastin-3; Actin-bundling protein found in intestinal microvilli, hair cell stereocilia, and fibroblast filopodia. May play a role in the regulation of bone development; EF-hand domain containing
GLOD4	9739.XP_004318053.1	9606.ENSP00000301329	4	7.7±3.34	GLOD4	Glyoxalase domain containing 4							Peptidyl-prolyl cis-trans isomerase A; PPIases accelerate the folding of proteins. It catalyzes the cis-trans isomerization of proline imidic peptide bonds in oligopeptides; Belongs to the cyclophilin-type PPIase family. PPIase A subfamily
GNB1	NA	9606.ENSP00000481878	4	6.1±2.69	GNB1	Guanine nucleotide-binding protein G(I)/G(S)/G(T) subunit beta-1; Guanine nucleotide-binding proteins (G proteins) are involved as a modulator or transducer in various transmembrane signaling systems. The beta and gamma chains are required for the GTPase activity, for replacement of GDP by GTP, and for G protein- effector interaction							Peptidyl-prolyl cis-trans isomerase B; PPIases accelerate the folding of proteins. It catalyzes the cis-trans isomerization of proline imidic peptide bonds in oligopeptides; Cyclophilin peptidylprolyl isomerases
RAB10	9739.XP_004320499.1	9606.ENSP00000264710	4	6.58±3.1	RAB10	Ras-related protein Rab-10; The small GTPases Rab are key regulators of intracellular membrane trafficking, from the formation of transport vesicles to their fusion with membranes. Rabs cycle between an inactive GDP-bound form and an active GTP-bound form that is able to recruit to membranes different set of downstream effectors directly responsible for vesicle formation, movement, tethering and …							Protein phosphatase 1 regulatory subunit 7; Regulatory subunit of protein phosphatase 1; Belongs to the SDS22 family
RAB2A	NA	9606.ENSP00000262646	4	6.82±2.45	RAB2A	Ras-related protein Rab-2A; Required for protein transport from the endoplasmic reticulum to the Golgi complex; RAB, member RAS oncogene GTPases							Peroxiredoxin-4; Thiol-specific peroxidase that catalyzes the reduction of hydrogen peroxide and organic hydroperoxides to water and alcohols, respectively. Plays a role in cell protection against oxidative stress by detoxifying peroxides and as sensor of hydrogen peroxide-mediated signaling events. Regulates the activation of NF-kappa-B in the cytosol by a modulation of I- kappa-B-alpha phosphor…
TMED10	NA	9606.ENSP00000303145	4	7±3.02	TMED10	Transmembrane emp24 domain-containing protein 10; Involved in vesicular protein trafficking. Mainly functions in the early secretory pathway. Thought to act as cargo receptor at the lumenal side for incorporation of secretory cargo molecules into transport vesicles and to be involved in vesicle coat formation at the cytoplasmic side. In COPII vesicle-mediated anterograde transport involved in the…							Peroxiredoxin-5, mitochondrial; Thiol-specific peroxidase that catalyzes the reduction of hydrogen peroxide and organic hydroperoxides to water and alcohols, respectively. Plays a role in cell protection against oxidative stress by detoxifying peroxides and as sensor of hydrogen peroxide-mediated signaling events; Belongs to the peroxiredoxin family. Prx5 subfamily
ARL1	9739.XP_004323372.1	9606.ENSP00000261636	3.75	6.43±2.55	ARL1	ADP-ribosylation factor-like protein 1; GTP-binding protein that has very low efficiency as allosteric activator of the cholera toxin catalytic subunit, an ADP-ribosyltransferase. Can activate phospholipase D with very low efficiency. Important for normal function of the Golgi apparatus; ARF GTPase family							cAMP-dependent protein kinase catalytic subunit alpha; Phosphorylates a large number of substrates in the cytoplasm and the nucleus. Regulates the abundance of compartmentalized pools of its regulatory subunits through phosphorylation of PJA2 which binds and ubiquitinates these subunits, leading to their subsequent proteolysis. Phosphorylates CDC25B, ABL1, NFKB1, CLDN3, PSMC5/RPT6, PJA2, RYR2, RO…
CANX	9739.XP_004312998.1	9606.ENSP00000247461	3.75	5.73±2.56	CANX	Calnexin; Calcium-binding protein that interacts with newly synthesized glycoproteins in the endoplasmic reticulum. It may act in assisting protein assembly and/or in the retention within the ER of unassembled protein subunits. It seems to play a major role in the quality control apparatus of the ER by the retention of incorrectly folded proteins. Associated with partial T-cell antigen receptor c…							cAMP-dependent protein kinase catalytic subunit beta; Mediates cAMP-dependent signaling triggered by receptor binding to GPCRs. PKA activation regulates diverse cellular processes such as cell proliferation, the cell cycle, differentiation and regulation of microtubule dynamics, chromatin condensation and decondensation, nuclear envelope disassembly and reassembly, as well as regulation of intrac…
COPA	9739.XP_004312715.1	9606.ENSP00000357048	3.75	5.74±3.78	COPA	Coatomer subunit alpha; The coatomer is a cytosolic protein complex that binds to dilysine motifs and reversibly associates with Golgi non- clathrin-coated vesicles, which further mediate biosynthetic protein transport from the ER, via the Golgi up to the trans Golgi network. Coatomer complex is required for budding from Golgi membranes, and is essential for the retrograde Golgi-to-ER transport o…							cAMP-dependent protein kinase type I-alpha regulatory subunit; Regulatory subunit of the cAMP-dependent protein kinases involved in cAMP signaling in cells
ENTPD5	9739.XP_004315417.1	9606.ENSP00000335246	3.75	4.66±1.62	ENTPD5	Ectonucleoside triphosphate diphosphohydrolase 5; Uridine diphosphatase (UDPase) that promotes protein N- glycosylation and ATP level regulation. UDP hydrolysis promotes protein N-glycosylation and folding in the endoplasmic reticulum, as well as elevated ATP consumption in the cytosol via an ATP hydrolysis cycle. Together with CMPK1 and AK1, constitutes an ATP hydrolysis cycle that converts ATP …							Glucosidase 2 subunit beta; Regulatory subunit of glucosidase II; EF-hand domain containing
GAA	9739.XP_004319565.1	9606.ENSP00000305692	3.75	5.46±4.35	GAA	Lysosomal alpha-glucosidase; Essential for the degradation of glycogen in lysosomes. Has highest activity on alpha-1,4-linked glycosidic linkages, but can also hydrolyze alpha-1,6-linked glucans							Prominin-2; Prominin 2
GANAB	9739.XP_004317366.1	9606.ENSP00000340466	3.75	6.47±4.49	GANAB	Neutral alpha-glucosidase AB; Cleaves sequentially the 2 innermost alpha-1,3-linked glucose residues from the Glc(2)Man(9)GlcNAc(2) oligosaccharide precursor of immature glycoproteins. Required for PKD1/Polycystin-1 and PKD2/Polycystin-2 maturation and localization to the cell surface and cilia; Belongs to the glycosyl hydrolase 31 family							Polyserase-2; Serine protease. Hydrolyzes the peptides N-t-Boc-Gln- Ala-Arg-AMC and N-t-Boc-Gln-Gly-Arg-AMC and, to a lesser extent, N-t-Boc-Ala-Phe-Lys-AMC and N-t-Boc-Val-Leu-Lys-AMC. Has a preference for substrates with an Arg instead of a Lys residue in position P1; Belongs to the peptidase S1 family
HEXB	9739.XP_004316947.1	9606.ENSP00000261416	3.75	6.48±2.89	HEXB	Beta-hexosaminidase subunit beta; Responsible for the degradation of GM2 gangliosides, and a variety of other molecules containing terminal N-acetyl hexosamines, in the brain and other tissues; Belongs to the glycosyl hydrolase 20 family							Probable inactive serine protease 37; Plays a role in male fertility (By similarity). May have a role in sperm migration or binding to zona-intact eggs (By similarity). Involved in the activation of the proacrosin/acrosin system; Belongs to the peptidase S1 family
NT5DC1	9739.XP_004316828.1	9606.ENSP00000326858	3.75	5.46±2.51	NT5DC1	5'-nucleotidase domain containing 1							Serine protease 55; Probable serine protease
PGP	9739.XP_004326506.1	9606.ENSP00000330918	3.75	6.3±4.01	PGP	Glycerol-3-phosphate phosphatase; Glycerol-3-phosphate phosphatase hydrolyzing glycerol-3- phosphate into glycerol. Thereby, regulates the cellular levels of glycerol-3-phosphate a metabolic intermediate of glucose, lipid and energy metabolism. Was also shown to have a 2-phosphoglycolate phosphatase activity and a tyrosine-protein phosphatase activity. However, their physiological relevance is un…							Prosaposin; Saposins are specific low-molecular mass non-enzymic proteins, they participate in the lysosomal degradation of sphingolipids, which takes place by the sequential action of specific hydrolases; Endogenous ligands
RNASE4	NA	9606.ENSP00000336762	3.75	6.42±0.91	ANG	Angiogenin; Binds to actin on the surface of endothelial cells; once bound, angiogenin is endocytosed and translocated to the nucleus. Stimulates ribosomal RNA synthesis including that containing the initiation site sequences of 45S rRNA. Cleaves tRNA within anticodon loops to produce tRNA-derived stress-induced fragments (tiRNAs) which inhibit protein synthesis and triggers the assembly of stres…							Prostaglandin-H2 D-isomerase; Catalyzes the conversion of PGH2 to PGD2, a prostaglandin involved in smooth muscle contraction/relaxation and a potent inhibitor of platelet aggregation. Involved in a variety of CNS functions, such as sedation, NREM sleep and PGE2-induced allodynia, and may have an anti-apoptotic role in oligodendrocytes. Binds small non-substrate lipophilic molecules, including bi…
PTGDS	9739.XP_004315214.1	9606.ENSP00000360687	3.67	4.96±2.61	PTGDS	Prostaglandin-H2 D-isomerase; Catalyzes the conversion of PGH2 to PGD2, a prostaglandin involved in smooth muscle contraction/relaxation and a potent inhibitor of platelet aggregation. Involved in a variety of CNS functions, such as sedation, NREM sleep and PGE2-induced allodynia, and may have an anti-apoptotic role in oligodendrocytes. Binds small non-substrate lipophilic molecules, including bi…							Receptor-type tyrosine-protein phosphatase alpha; Protein tyrosine phosphatase, receptor type A; Belongs to the protein-tyrosine phosphatase family. Receptor class 4 subfamily
CAPN5	9739.XP_004317412.1	9606.ENSP00000278559	3.5	5.67±4.11	CAPN5	Calpain-5; Calcium-regulated non-lysosomal thiol-protease; C2 domain containing							Glutaminyl-peptide cyclotransferase; Responsible for the biosynthesis of pyroglutamyl peptides. Has a bias against acidic and tryptophan residues adjacent to the N-terminal glutaminyl residue and a lack of importance of chain length after the second residue. Also catalyzes N-terminal pyroglutamate formation. In vitro, catalyzes pyroglutamate formation of N-terminally truncated form of APP amyloid…
GNS	9739.XP_004314604.1	9606.ENSP00000258145	3.5	5.02±2.57	GNS	N-acetylglucosamine-6-sulfatase; Glucosamine-6-sulfatase; Belongs to the sulfatase family							Sulfhydryl oxidase 1; Catalyzes the oxidation of sulfhydryl groups in peptide and protein thiols to disulfides with the reduction of oxygen to hydrogen peroxide. May contribute to disulfide bond formation in a variety of secreted proteins. In fibroblasts, it may have tumor- suppressing capabilities being involved in growth regulation; Belongs to the quiescin-sulfhydryl oxidase (QSOX) family
PRKCSH	9739.XP_004332354.1	9606.ENSP00000466134	3.5	5.34±3.08	PRKCSH	Glucosidase 2 subunit beta; Regulatory subunit of glucosidase II; EF-hand domain containing							Ras-related protein Rab-10; The small GTPases Rab are key regulators of intracellular membrane trafficking, from the formation of transport vesicles to their fusion with membranes. Rabs cycle between an inactive GDP-bound form and an active GTP-bound form that is able to recruit to membranes different set of downstream effectors directly responsible for vesicle formation, movement, tethering and …
SH3GLB1	9739.XP_004316236.1	9606.ENSP00000479919	3.33	5.11±2.74	SH3GLB1	Endophilin-B1; May be required for normal outer mitochondrial membrane dynamics. Required for coatomer-mediated retrograde transport in certain cells (By similarity). May recruit other proteins to membranes with high curvature. May promote membrane fusion. Involved in activation of caspase-dependent apoptosis by promoting BAX/BAK1 activation. Isoform 1 acts proapoptotic in fibroblasts (By similar…							Ras-related protein Rab-14; Involved in membrane trafficking between the Golgi complex and endosomes during early embryonic development. Regulates the Golgi to endosome transport of FGFR-containing vesicles during early development, a key process for developing basement membrane and epiblast and primitive endoderm lineages during early postimplantation development. May act by modulating the kines…
TMX1	NA	9606.ENSP00000393316	3.33	6.28±1.58	TMX1	Thioredoxin-related transmembrane protein 1; May participate in various redox reactions through the reversible oxidation of its active center dithiol to a disulfide and catalyze dithiol-disulfide exchange reactions; Protein disulfide isomerases							Ras-related protein Rab-18; RAB18, member RAS oncogene family
USP5	9739.XP_004314798.1	9606.ENSP00000229268	3.33	4.25±0.26	USP5	Ubiquitin carboxyl-terminal hydrolase 5; Cleaves linear and branched multiubiquitin polymers with a marked preference for branched polymers. Involved in unanchored 'Lys-48'-linked polyubiquitin disassembly. Binds linear and 'Lys- 63'-linked polyubiquitin with a lower affinity. Knock-down of USP5 causes the accumulation of p53/TP53 and an increase in p53/TP53 transcriptional activity because the u…							Ras-related protein Rab-1A; The small GTPases Rab are key regulators of intracellular membrane trafficking, from the formation of transport vesicles to their fusion with membranes. Rabs cycle between an inactive GDP-bound form and an active GTP-bound form that is able to recruit to membranes different sets of downstream effectors directly responsible for vesicle formation, movement, tethering and…
DSTN	NA	9606.ENSP00000246069	3.25	4.45±1.14	DSTN	Destrin; Actin-depolymerizing protein. Severs actin filaments (F- actin) and binds to actin monomers (G-actin). Acts in a pH- independent manner							Ras-related protein Rab-1B; The small GTPases Rab are key regulators of intracellular membrane trafficking, from the formation of transport vesicles to their fusion with membranes. Rabs cycle between an inactive GDP-bound form and an active GTP-bound form that is able to recruit to membranes different set of downstream effectors directly responsible for vesicle formation, movement, tethering and …
env	9739.XP_004331494.1	9606.ENSP00000419945	3.25	5.06±1.95	ERVW-1	Syncytin-1; This endogenous retroviral envelope protein has retained its original fusogenic properties and participates in trophoblast fusion and the formation of a syncytium during placenta morphogenesis. May induce fusion through binding of SLC1A4 and SLC1A5							Ras-related protein Rab-2A; Required for protein transport from the endoplasmic reticulum to the Golgi complex; RAB, member RAS oncogene GTPases
SORT1	9739.XP_004327410.1	9606.ENSP00000256637	3.25	5.42±0.93	SORT1	Sortilin; Functions as a sorting receptor in the Golgi compartment and as a clearance receptor on the cell surface. Required for protein transport from the Golgi apparatus to the lysosomes by a pathway that is independent of the mannose-6-phosphate receptor (M6PR). Also required for protein transport from the Golgi apparatus to the endosomes. Promotes neuronal apoptosis by mediating endocytosis o…							GTP-binding nuclear protein Ran; GTPase involved in nucleocytoplasmic transport, participating both to the import and the export from the nucleus of proteins and RNAs. Switches between a cytoplasmic GDP- and a nuclear GTP-bound state by nucleotide exchange and GTP hydrolysis. Nuclear import receptors such as importin beta bind their substrates only in the absence of GTP-bound RAN and release them…
CA2	9739.XP_004324981.1	9606.ENSP00000285379	3	4.35±2.42	CA2	Carbonic anhydrase 2; Essential for bone resorption and osteoclast differentiation (By similarity). Reversible hydration of carbon dioxide. Can hydrate cyanamide to urea. Involved in the regulation of fluid secretion into the anterior chamber of the eye. Contributes to intracellular pH regulation in the duodenal upper villous epithelium during proton-coupled peptide absorption. Stimulates the chl…							Retinoic acid receptor responder protein 1; Inhibitor of the cytoplasmic carboxypeptidase AGBL2, may regulate the alpha-tubulin tyrosination cycle
CDC42	9739.XP_004316164.1	9606.ENSP00000383118	3	5.6±3.46	CDC42	Cell division control protein 42 homolog; Plasma membrane-associated small GTPase which cycles between an active GTP-bound and an inactive GDP-bound state. In active state binds to a variety of effector proteins to regulate cellular responses. Involved in epithelial cell polarization processes. Regulates the bipolar attachment of spindle microtubules to kinetochores before chromosome congression …							Retinol-binding protein 4; Retinol-binding protein that mediates retinol transport in blood plasma. Delivers retinol from the liver stores to the peripheral tissues (Probable). Transfers the bound all-trans retinol to STRA6, that then facilitates retinol transport across the cell membrane; Belongs to the calycin superfamily. Lipocalin family
COG3	9739.XP_004319736.1	9606.ENSP00000258654	3	4.51±2.94	COG3	Conserved oligomeric Golgi complex subunit 3; Involved in ER-Golgi transport; Belongs to the COG3 family							Inactive ribonuclease-like protein 10; Secreted proximal epididymal protein required for post- testicular sperm maturation and male fertility. May be involved in sperm adhesion to the egg zona pellucida. Does not have ribonuclease activity (By similarity)
FUCA1	9739.XP_004320306.1	9606.ENSP00000363603	3	5.47±1.6	FUCA1	Tissue alpha-L-fucosidase; Alpha-L-fucosidase is responsible for hydrolyzing the alpha-1,6-linked fucose joined to the reducing-end N- acetylglucosamine of the carbohydrate moieties of glycoproteins							Angiogenin; Binds to actin on the surface of endothelial cells; once bound, angiogenin is endocytosed and translocated to the nucleus. Stimulates ribosomal RNA synthesis including that containing the initiation site sequences of 45S rRNA. Cleaves tRNA within anticodon loops to produce tRNA-derived stress-induced fragments (tiRNAs) which inhibit protein synthesis and triggers the assembly of stres…
HMOX2	9739.XP_004310399.1	9606.ENSP00000477572	3	5.21±2.49	HMOX2	Heme oxygenase 2; Heme oxygenase cleaves the heme ring at the alpha methene bridge to form biliverdin. Biliverdin is subsequently converted to bilirubin by biliverdin reductase. Under physiological conditions, the activity of heme oxygenase is highest in the spleen, where senescent erythrocytes are sequestrated and destroyed. Heme oxygenase 2 could be implicated in the production of carbon monoxi…							Ribonuclease T2; Has ribonuclease activity, with higher activity at acidic pH. Probably is involved in lysosomal degradation of ribosomal RNA (By similarity). Probably plays a role in cellular RNA catabolism; Belongs to the RNase T2 family
LPCAT4	9739.XP_004310983.1	9606.ENSP00000317300	3	5.14±2.56	LPCAT4	Lysophospholipid acyltransferase LPCAT4; Displays acyl-CoA-dependent lysophospholipid acyltransferase activity with a subset of lysophospholipids as substrates; converts lysophosphatidylethanolamine to phosphatidylethanolamine, lysophosphatidylcholine to phosphatidycholine, 1-alkenyl-lysophatidylethanolamine to 1- alkenyl-phosphatidylethanolamine, lysophosphatidylglycerol and alkyl-lysophosphatid…							E3 ubiquitin-protein ligase RNF133; Has E3 ubiquitin-protein ligase activity; Ring finger proteins
MYADM	9739.XP_004324083.1	9606.ENSP00000375649	3	3.1±1.06	MYADM	Myeloid associated differentiation marker; Belongs to the MAL family							Ropporin-1A; Important for male fertility. With ROPN1L, involved in fibrous sheath integrity and sperm motility, plays a role in PKA- dependent signaling processes required for spermatozoa capacitation; Belongs to the ropporin family
PPIB	9739.XP_004315275.1	9606.ENSP00000300026	3	5.55±1.04	PPIB	Peptidyl-prolyl cis-trans isomerase B; PPIases accelerate the folding of proteins. It catalyzes the cis-trans isomerization of proline imidic peptide bonds in oligopeptides; Cyclophilin peptidylprolyl isomerases							Ropporin-1-like protein; Important for male fertility. With ROPN1, involved in fibrous sheath integrity and sperm motility, plays a role in PKA- dependent signaling processes required for spermatozoa capacitation
PRSS36	9739.XP_004330288.1	9606.ENSP00000268281	3	4.79±1.9	PRSS36	Polyserase-2; Serine protease. Hydrolyzes the peptides N-t-Boc-Gln- Ala-Arg-AMC and N-t-Boc-Gln-Gly-Arg-AMC and, to a lesser extent, N-t-Boc-Ala-Phe-Lys-AMC and N-t-Boc-Val-Leu-Lys-AMC. Has a preference for substrates with an Arg instead of a Lys residue in position P1; Belongs to the peptidase S1 family							Dolichyl-diphosphooligosaccharide--protein glycosyltransferase subunit 1; Essential subunit of the N-oligosaccharyl transferase (OST) complex which catalyzes the transfer of a high mannose oligosaccharide from a lipid-linked oligosaccharide donor to an asparagine residue within an Asn-X-Ser/Thr consensus motif in nascent polypeptide chains; Belongs to the OST1 family
PTPA	NA	9606.ENSP00000369756	3	5.2±3.27	PTPRA	Receptor-type tyrosine-protein phosphatase alpha; Protein tyrosine phosphatase, receptor type A; Belongs to the protein-tyrosine phosphatase family. Receptor class 4 subfamily							Dolichyl-diphosphooligosaccharide--protein glycosyltransferase subunit 2; Essential subunit of the N-oligosaccharyl transferase (OST) complex which catalyzes the transfer of a high mannose oligosaccharide from a lipid-linked oligosaccharide donor to an asparagine residue within an Asn-X-Ser/Thr consensus motif in nascent polypeptide chains; Belongs to the SWP1 family
ROPN1L	9739.XP_004315191.1	9606.ENSP00000421405	3	5.42±0.96	ROPN1L	Ropporin-1-like protein; Important for male fertility. With ROPN1, involved in fibrous sheath integrity and sperm motility, plays a role in PKA- dependent signaling processes required for spermatozoa capacitation							GTP-binding protein SAR1a; Involved in transport from the endoplasmic reticulum to the Golgi apparatus (By similarity). Required to maintain SEC16A localization at discrete locations on the ER membrane perhaps by preventing its dissociation. SAR1A-GTP-dependent assembly of SEC16A on the ER membrane forms an organized scaffold defining endoplasmic reticulum exit sites (ERES); ARF GTPase family
UBE2D3	NA	9606.ENSP00000349722	3	5.36±3.04	UBE2D3	Ubiquitin conjugating enzyme E2 D3; Belongs to the ubiquitin-conjugating enzyme family							Saccharopine dehydrogenase-like oxidoreductase; Saccharopine dehydrogenase; Belongs to the saccharopine dehydrogenase family
USP7	9739.XP_004323151.1	9606.ENSP00000343535	3	5.49±2.87	USP7	Ubiquitin carboxyl-terminal hydrolase 7; Hydrolase that deubiquitinates target proteins such as FOXO4, p53/TP53, MDM2, ERCC6, DNMT1, UHRF1, PTEN and DAXX. Together with DAXX, prevents MDM2 self-ubiquitination and enhances the E3 ligase activity of MDM2 towards p53/TP53, thereby promoting p53/TP53 ubiquitination and proteasomal degradation. Deubiquitinates p53/TP53, preventing degradation of p53/T…							Syntenin-1; Multifunctional adapter protein involved in diverse array of functions including trafficking of transmembrane proteins, neuro and immunomodulation, exosome biogenesis, and tumorigenesis. Positively regulates TGFB1- mediated SMAD2/3 activation and TGFB1-induced epithelial-to- mesenchymal transition (EMT) and cell migration in various cell types. May increase TGFB1 signaling by enhancin…
ADAM32	9739.XP_004317621.1	9606.ENSP00000369238	2.75	4.18±2.24	ADAM32	Disintegrin and metalloproteinase domain-containing protein 32; May play a role in sperm development and fertilization This is a non-catalytic metalloprotease-like protein; ADAM metallopeptidase domain containing							Alpha-1-antitrypsin; Inhibitor of serine proteases. Its primary target is elastase, but it also has a moderate affinity for plasmin and thrombin. Irreversibly inhibits trypsin, chymotrypsin and plasminogen activator. The aberrant form inhibits insulin-induced NO synthesis in platelets, decreases coagulation time and has proteolytic activity against insulin and plasmin; Belongs to the serpin family
FAAH	NA	9606.ENSP00000243167	2.75	5.04±2.56	FAAH	Fatty-acid amide hydrolase 1; Degrades bioactive fatty acid amides like oleamide, the endogenous cannabinoid, anandamide and myristic amide to their corresponding acids, thereby serving to terminate the signaling functions of these molecules. Hydrolyzes polyunsaturated substrate anandamide preferentially as compared to monounsaturated substrates							Serpin B6; May be involved in the regulation of serine proteinases present in the brain or extravasated from the blood (By similarity). Inhibitor of cathepsin G, kallikrein-8 and thrombin. May play an important role in the inner ear in the protection against leakage of lysosomal content during stress and loss of this protection results in cell death and sensorineural hearing loss; Deafness associ…
TCN2	9739.XP_004319021.1	9606.ENSP00000215838	2.75	5.54±0.93	TCN2	Transcobalamin-2; Primary vitamin B12-binding and transport protein. Delivers cobalamin to cells; Belongs to the eukaryotic cobalamin transport proteins family							Plasma protease C1 inhibitor; Activation of the C1 complex is under control of the C1- inhibitor. It forms a proteolytically inactive stoichiometric complex with the C1r or C1s proteases. May play a potentially crucial role in regulating important physiological pathways including complement activation, blood coagulation, fibrinolysis and the generation of kinins. Very efficient inhibitor of FXIIa…
CHID1	9739.XP_004325083.1	9606.ENSP00000398722	2.67	3.98±0.86	CHID1	Chitinase domain-containing protein 1; Saccharide- and LPS-binding protein with possible roles in pathogen sensing and endotoxin neutralization. Ligand-binding specificity relates to the length of the oligosaccharides, with preference for chitotetraose (in vitro); Belongs to the glycosyl hydrolase 18 family							Sphingosine-1-phosphate lyase 1; Cleaves phosphorylated sphingoid bases (PSBs), such as sphingosine-1-phosphate, into fatty aldehydes and phosphoethanolamine. Elevates stress-induced ceramide production and apoptosis; Belongs to the group II decarboxylase family. Sphingosine-1-phosphate lyase subfamily
GLT8D1	9739.XP_004315714.1	9606.ENSP00000266014	2.67	4.73±2.37	GLT8D1	Glycosyltransferase 8 domain containing 1; Belongs to the glycosyltransferase 8 family							Endophilin-B1; May be required for normal outer mitochondrial membrane dynamics. Required for coatomer-mediated retrograde transport in certain cells (By similarity). May recruit other proteins to membranes with high curvature. May promote membrane fusion. Involved in activation of caspase-dependent apoptosis by promoting BAX/BAK1 activation. Isoform 1 acts proapoptotic in fibroblasts (By similar…
SLC16A1	9739.XP_004317157.1	9606.ENSP00000441065	2.67	4.53±2.2	SLC16A1	Monocarboxylate transporter 1; Proton-coupled monocarboxylate transporter. Catalyzes the rapid transport across the plasma membrane of many monocarboxylates such as lactate, pyruvate, branched-chain oxo acids derived from leucine, valine and isoleucine, and the ketone bodies acetoacetate, beta-hydroxybutyrate and acetate. Depending on the tissue and on cicumstances, mediates the import or export …							Testicular spindle-associated protein SHCBP1L; Testis-specific spindle-associated factor that plays a role in spermatogenesis. In association with HSPA2, participates in the maintenance of spindle integrity during meiosis in male germ cells
YWHAQ	9739.XP_004332743.1	9606.ENSP00000371267	2.67	4.63±2.25	YWHAQ	14-3-3 protein theta; Adapter protein implicated in the regulation of a large spectrum of both general and specialized signaling pathways. Binds to a large number of partners, usually by recognition of a phosphoserine or phosphothreonine motif. Binding generally results in the modulation of the activity of the binding partner. Negatively regulates the kinase activity of PDPK1; Belongs to the 14-3…							Sialate O-acetylesterase; Catalyzes the removal of O-acetyl ester groups from position 9 of the parent sialic acid, N-acetylneuraminic acid
APOD	9739.XP_004321427.1	9606.ENSP00000345179	2.5	4.51±2.5	APOD	Apolipoprotein D; APOD occurs in the macromolecular complex with lecithin- cholesterol acyltransferase. It is probably involved in the transport and binding of bilin. Appears to be able to transport a variety of ligands in a number of different contexts; Apolipoproteins							Nucleotide exchange factor SIL1; Required for protein translocation and folding in the endoplasmic reticulum (ER). Functions as a nucleotide exchange factor for the ER lumenal chaperone HSPA5; Belongs to the SIL1 family
ATP6V1B2	9739.XP_004332730.1	9606.ENSP00000276390	2.33	4.01±2	ATP6V1B2	V-type proton ATPase subunit B, brain isoform; Non-catalytic subunit of the peripheral V1 complex of vacuolar ATPase. V-ATPase is responsible for acidifying a variety of intracellular compartments in eukaryotic cells; Belongs to the ATPase alpha/beta chains family							Monocarboxylate transporter 1; Proton-coupled monocarboxylate transporter. Catalyzes the rapid transport across the plasma membrane of many monocarboxylates such as lactate, pyruvate, branched-chain oxo acids derived from leucine, valine and isoleucine, and the ketone bodies acetoacetate, beta-hydroxybutyrate and acetate. Depending on the tissue and on cicumstances, mediates the import or export …
CYB5R3	NA	9606.ENSP00000354468	2.33	4.16±1.45	CYB5R3	NADH-cytochrome b5 reductase 3; Desaturation and elongation of fatty acids, cholesterol biosynthesis, drug metabolism, and, in erythrocyte, methemoglobin reduction							Monocarboxylate transporter 2; Proton-coupled monocarboxylate transporter. Catalyzes the rapid transport across the plasma membrane of many monocarboxylates such as lactate, pyruvate, branched-chain oxo acids derived from leucine, valine and isoleucine, and the ketone bodies acetoacetate, beta-hydroxybutyrate and acetate. Functions as high-affinity pyruvate transporter; Belongs to the major facil…
LGALS3BP	9739.XP_004323016.1	9606.ENSP00000262776	2.33	4±0	LGALS3BP	Galectin-3-binding protein; Promotes integrin-mediated cell adhesion. May stimulate host defense against viruses and tumor cells; BTB domain containing							Solute carrier family 2, facilitated glucose transporter member 3; Facilitative glucose transporter that can also mediate the uptake of various other monosaccharides across the cell membrane. Mediates the uptake of glucose, 2-deoxyglucose, galactose, mannose, xylose and fucose, and probably also dehydroascorbate. Does not mediate fructose transport; Belongs to the major facilitator superfamily. S…
MELTF	NA	9606.ENSP00000296350	2.33	4.28±2.09	MFI2	Melanotransferrin; Involved in iron cellular uptake. Seems to be internalized and then recycled back to the cell membrane. Binds a single atom of iron per subunit. Could also bind zinc							Sphingomyelin phosphodiesterase 2; Converts sphingomyelin to ceramide. Hydrolyze 1-acyl-2- lyso-sn-glycero-3-phosphocholine (lyso-PC) and 1-O-alkyl-2-lyso- sn-glycero-3-phosphocholine (lyso-platelet-activating factor). The physiological substrate seems to be Lyso-PAF; Belongs to the neutral sphingomyelinase family
PDIA4	NA	9606.ENSP00000286091	2.33	3.11±1.02	PDIA4	Protein disulfide-isomerase A4; Protein disulfide isomerase family A member 4; Belongs to the protein disulfide isomerase family							Superoxide dismutase [Cu-Zn]; Destroys radicals which are normally produced within the cells and which are toxic to biological systems
SAR1A	9739.XP_004324995.1	9606.ENSP00000362339	2.33	4±2	SAR1A	GTP-binding protein SAR1a; Involved in transport from the endoplasmic reticulum to the Golgi apparatus (By similarity). Required to maintain SEC16A localization at discrete locations on the ER membrane perhaps by preventing its dissociation. SAR1A-GTP-dependent assembly of SEC16A on the ER membrane forms an organized scaffold defining endoplasmic reticulum exit sites (ERES); ARF GTPase family							Extracellular superoxide dismutase [Cu-Zn]; Protect the extracellular space from toxic effect of reactive oxygen intermediates by converting superoxide radicals into hydrogen peroxide and oxygen
GPI	9739.XP_004310726.1	9606.ENSP00000405573	2.25	4.54±1.9	GPI	Glucose-6-phosphate isomerase; Besides it's role as a glycolytic enzyme, mammalian GPI can function as a tumor-secreted cytokine and an angiogenic factor (AMF) that stimulates endothelial cell motility. GPI is also a neurotrophic factor (Neuroleukin) for spinal and sensory neurons							Sortilin; Functions as a sorting receptor in the Golgi compartment and as a clearance receptor on the cell surface. Required for protein transport from the Golgi apparatus to the lysosomes by a pathway that is independent of the mannose-6-phosphate receptor (M6PR). Also required for protein transport from the Golgi apparatus to the endosomes. Promotes neuronal apoptosis by mediating endocytosis o…
ACP5	9739.XP_004316059.1	9606.ENSP00000468767	2	3.09±1.53	ACP5	Tartrate-resistant acid phosphatase type 5; Involved in osteopontin/bone sialoprotein dephosphorylation. Its expression seems to increase in certain pathological states such as Gaucher and Hodgkin diseases, the hairy cell, the B-cell, and the T-cell leukemias; Belongs to the metallophosphoesterase superfamily. Purple acid phosphatase family							Sperm-associated antigen 4 protein; Involved in spermatogenesis. Required for sperm head formation but not required to establish and maintain general polarity of the sperm head. Required for anchoring and organization of the manchette. Required for targeting of SUN3 and probably SYNE1 through a probable SUN1:SYNE3 LINC complex to the nuclear envelope and involved in accurate posterior sperm head …
CMPK1	9739.XP_004310741.1	9606.ENSP00000360939	2	2.67±1.43	CMPK1	UMP-CMP kinase; Catalyzes the phosphorylation of pyrimidine nucleoside monophosphates at the expense of ATP. Plays an important role in de novo pyrimidine nucleotide biosynthesis. Has preference for UMP and CMP as phosphate acceptors. Also displays broad nucleoside diphosphate kinase activity; Belongs to the adenylate kinase family. UMP-CMP kinase subfamily							Signal peptide peptidase-like 2C; Intramembrane-cleaving aspartic protease (I-CLiP) that may be able to cleave type II membrane signal peptides in the hydrophobic plane of the membrane
COPG2	NA	9606.ENSP00000402346	2	4.05±0.08	COPG2	Coatomer subunit gamma-2; The coatomer is a cytosolic protein complex that binds to dilysine motifs and reversibly associates with Golgi non- clathrin-coated vesicles, which further mediate biosynthetic protein transport from the ER, via the Golgi up to the trans Golgi network. Coatomer complex is required for budding from Golgi membranes, and is essential for the retrograde Golgi-to-ER transport…							Sequestosome-1; Autophagy receptor that interacts directly with both the cargo to become degraded and an autophagy modifier of the MAP1 LC3 family. Along with WDFY3, involved in the formation and autophagic degradation of cytoplasmic ubiquitin-containing inclusions (p62 bodies, ALIS/aggresome-like induced structures). Along with SQSTM1, required to recruit ubiquitinated proteins to PML bodies in …
FETUB	NA	9606.ENSP00000265029	2	2.92±1.58	FETUB	Fetuin-B; Protease inhibitor required for egg fertilization. Required to prevent premature zona pellucida hardening before fertilization, probably by inhibiting the protease activity of ASTL, a protease that mediates the cleavage of ZP2 and triggers zona pellucida hardening (By similarity); Belongs to the fetuin family							Erythrocyte band 7 integral membrane protein; Regulates ion channel activity and transmembrane ion transport. Regulates ASIC2 and ASIC3 channel activity; Belongs to the band 7/mec-2 family
LYZC	NA	9606.ENSP00000269053	2	4.11±3.38	SPACA3	Sperm acrosome membrane-associated protein 3; Sperm surface membrane protein that may be involved in sperm-egg plasma membrane adhesion and fusion during fertilization. It could be a potential receptor for the egg oligosaccharide residue N-acetylglucosamine, which is present in the extracellular matrix over the egg plasma membrane. The processed form has no detectable bacteriolytic activity in vi…							Synaptophysin-like protein 1; Synaptophysin like 1; Belongs to the synaptophysin/synaptobrevin family
SGPL1	9739.XP_004329401.1	9606.ENSP00000362298	2	2.84±1.04	SGPL1	Sphingosine-1-phosphate lyase 1; Cleaves phosphorylated sphingoid bases (PSBs), such as sphingosine-1-phosphate, into fatty aldehydes and phosphoethanolamine. Elevates stress-induced ceramide production and apoptosis; Belongs to the group II decarboxylase family. Sphingosine-1-phosphate lyase subfamily							Tax1-binding protein 1; Inhibits TNF-induced apoptosis by mediating the TNFAIP3 anti-apoptotic activity. Degraded by caspase-3-like family proteins upon TNF-induced apoptosis. May also play a role in the pro-inflammatory cytokine IL-1 signaling cascade
DNAJA2	NA	9606.ENSP00000314030	1.75	3.5±1.91	DNAJA2	DnaJ homolog subfamily A member 2; Co-chaperone of Hsc70. Stimulates ATP hydrolysis and the folding of unfolded proteins mediated by HSPA1A/B (in vitro); DNAJ heat shock proteins							Transcobalamin-2; Primary vitamin B12-binding and transport protein. Delivers cobalamin to cells; Belongs to the eukaryotic cobalamin transport proteins family
ADAM10	9739.XP_004324685.1	9606.ENSP00000260408	1.67	3.29±1.15	ADAM10	Disintegrin and metalloproteinase domain-containing protein 10; Cleaves the membrane-bound precursor of TNF-alpha at '76-Ala-|-Val-77' to its mature soluble form. Responsible for the proteolytical release of soluble JAM3 from endothelial cells surface. Responsible for the proteolytic release of several other cell-surface proteins, including heparin-binding epidermal growth-like factor, ephrin-A2,…							T-complex protein 1 subunit alpha; Molecular chaperone; assists the folding of proteins upon ATP hydrolysis. As part of the BBS/CCT complex may play a role in the assembly of BBSome, a complex involved in ciliogenesis regulating transports vesicles to the cilia. Known to play a role, in vitro, in the folding of actin and tubulin; Belongs to the TCP-1 chaperonin family
ARMT1	NA	9606.ENSP00000356263	1.67	3.14±1.03	C6orf211	Protein-glutamate O-methyltransferase; O-methyltransferase that methylates glutamate residues of target proteins to form gamma-glutamyl methyl ester residues. Methylates PCNA, suggesting it is involved in the DNA damage response							Testis-expressed protein 101; Plays a role in fertilization by controlling binding of sperm to zona pellucida and migration of spermatozoa into the oviduct (By similarity). May play a role in signal transduction and promote protein tyrosine phosphorylation (By similarity); LY6/PLAUR domain containing
BRI3BP	9739.XP_004310479.1	9606.ENSP00000340761	1.67	2.54±0.94	BRI3BP	BRI3-binding protein; Involved in tumorigenesis and may function by stabilizing p53/TP53							Serotransferrin; Transferrins are iron binding transport proteins which can bind two Fe(3+) ions in association with the binding of an anion, usually bicarbonate. It is responsible for the transport of iron from sites of absorption and heme degradation to those of storage and utilization. Serum transferrin may also have a further role in stimulating cell proliferation
CFAP36	NA	9606.ENSP00000342699	1.67	2.67±1.15	CFAP36	Cilia- and flagella-associated protein 36; May act as an effector for ARL3; Belongs to the CFAP36 family							Transketolase; Catalyzes the transfer of a two-carbon ketol group from a ketose donor to an aldose acceptor, via a covalent intermediate with the cofactor thiamine pyrophosphate; Belongs to the transketolase family
LCN6	9739.XP_004314901.1	9606.ENSP00000339621	1.67	3.4±1	LCN6	Epididymal-specific lipocalin-6; May play a role in male fertility; Lipocalins							Transmembrane 9 superfamily member 3
MPI	9739.XP_004312175.1	9606.ENSP00000318318	1.67	2.1±0.15	MPI	Mannose-6-phosphate isomerase; Involved in the synthesis of the GDP-mannose and dolichol-phosphate-mannose required for a number of critical mannosyl transfer reactions; Belongs to the mannose-6-phosphate isomerase type 1 family							Transmembrane 9 superfamily member 4; Associates with proteins harboring glycine-rich transmembrane domains and ensures their efficient localization to the cell surface. Regulates the assembly and activity of V-ATPase in colon cancer cells via its interaction with V-type proton ATPase subunit H (ATP6V1H) and contributes to V-ATPase-mediated pH alterations in cancer cells which play an important r…
NAP1L4	9739.XP_004322833.1	9606.ENSP00000369915	1.67	2.83±1.76	NAP1L4	Nucleosome assembly protein 1-like 4; Acts as histone chaperone in nucleosome assembly; Belongs to the nucleosome assembly protein (NAP) family							Transmembrane emp24 domain-containing protein 10; Involved in vesicular protein trafficking. Mainly functions in the early secretory pathway. Thought to act as cargo receptor at the lumenal side for incorporation of secretory cargo molecules into transport vesicles and to be involved in vesicle coat formation at the cytoplasmic side. In COPII vesicle-mediated anterograde transport involved in the…
NAPA	9739.XP_004311954.1	9606.ENSP00000263354	1.67	4.56±2.22	NAPA	Alpha-soluble NSF attachment protein; Required for vesicular transport between the endoplasmic reticulum and the Golgi apparatus (Probable). Together with GNA12 promotes CDH5 localization to plasma membrane; Belongs to the SNAP family							Transmembrane protein 205; In cancer cells, plays a role in resistance to the chemotherapeutic agent cisplatin
PLPP1	NA	9606.ENSP00000264775	1.67	3.28±1.24	PPAP2A	Phospholipid phosphatase 1; Phosphatidic acid phosphatase type 2A							Thioredoxin-related transmembrane protein 1; May participate in various redox reactions through the reversible oxidation of its active center dithiol to a disulfide and catalyze dithiol-disulfide exchange reactions; Protein disulfide isomerases
SMPD2	9739.XP_004315700.1	9606.ENSP00000258052	1.67	2.34±0.59	SMPD2	Sphingomyelin phosphodiesterase 2; Converts sphingomyelin to ceramide. Hydrolyze 1-acyl-2- lyso-sn-glycero-3-phosphocholine (lyso-PC) and 1-O-alkyl-2-lyso- sn-glycero-3-phosphocholine (lyso-platelet-activating factor). The physiological substrate seems to be Lyso-PAF; Belongs to the neutral sphingomyelinase family							Thioredoxin related transmembrane protein 4; Protein disulfide isomerases
SYPL1	NA	9606.ENSP00000011473	1.67	3.01±1.01	SYPL1	Synaptophysin-like protein 1; Synaptophysin like 1; Belongs to the synaptophysin/synaptobrevin family							Triosephosphate isomerase 1; Belongs to the triosephosphate isomerase family
ANXA2	NA	9606.ENSP00000346032	1.33	2.67±1.15	ANXA2	Annexin A2; Calcium-regulated membrane-binding protein whose affinity for calcium is greatly enhanced by anionic phospholipids. It binds two calcium ions with high affinity. May be involved in heat-stress response. Inhibits PCSK9-enhanced LDLR degradation, probably reduces PCSK9 protein levels via a translational mechanism but also competes with LDLR for binding with PCSK9; Belongs to the annexin…							Tubulin beta chain; Tubulin is the major constituent of microtubules. It binds two moles of GTP, one at an exchangeable site on the beta chain and one at a non-exchangeable site on the alpha chain; Tubulins
CCDC126	NA	9606.ENSP00000304355	1.33	2.03±0.03	CCDC126	Coiled-coil domain containing 126							Tubulin beta-4B chain; Tubulin is the major constituent of microtubules. It binds two moles of GTP, one at an exchangeable site on the beta chain and one at a non-exchangeable site on the alpha chain; Belongs to the tubulin family
CD44	9739.XP_004316201.1	9606.ENSP00000398632	1.33	2.2±0.34	CD44	CD44 antigen; Receptor for hyaluronic acid (HA). Mediates cell-cell and cell-matrix interactions through its affinity for HA, and possibly also through its affinity for other ligands such as osteopontin, collagens, and matrix metalloproteinases (MMPs). Adhesion with HA plays an important role in cell migration, tumor growth and progression. In cancer cells, may play an important role in invadopod…							Thioredoxin domain-containing protein 12; Possesses significant protein thiol-disulfide oxidase activity
DNASE1L1	9739.XP_004319579.1	9606.ENSP00000358824	1.33	2.67±1.15	DNASE1L1	Deoxyribonuclease 1 like 1; Belongs to the DNase I family							Thioredoxin domain-containing protein 5; Possesses thioredoxin activity. Has been shown to reduce insulin disulfide bonds. Also complements protein disulfide- isomerase deficiency in yeast (By similarity)
IPO7	9739.XP_004329508.1	9606.ENSP00000369042	1.33	2.43±0.74	IPO7	Importin-7; Functions in nuclear protein import, either by acting as autonomous nuclear transport receptor or as an adapter-like protein in association with the importin-beta subunit KPNB1. Acting autonomously, is thought to serve itself as receptor for nuclear localization signals (NLS) and to promote translocation of import substrates through the nuclear pore complex (NPC) by an energy requirin…							Ubiquitin-like modifier-activating enzyme 1; Catalyzes the first step in ubiquitin conjugation to mark cellular proteins for degradation through the ubiquitin- proteasome system. Activates ubiquitin by first adenylating its C-terminal glycine residue with ATP, and thereafter linking this residue to the side chain of a cysteine residue in E1, yielding a ubiquitin-E1 thioester and free AMP. Essenti…
LHPP	9739.XP_004324078.1	9606.ENSP00000357835	1.33	2.01±0.01	LHPP	Phospholysine phosphohistidine inorganic pyrophosphate phosphatase; Phosphatase that hydrolyzes imidodiphosphate, 3- phosphohistidine and 6-phospholysine. Has broad substrate specificity and can also hydrolyze inorganic diphosphate, but with lower efficiency (By similarity); Belongs to the HAD-like hydrolase superfamily							Polyubiquitin-B; Ubiquitin: Exists either covalently attached to another protein, or free (unanchored). When covalently bound, it is conjugated to target proteins via an isopeptide bond either as a monomer (monoubiquitin), a polymer linked via different Lys residues of the ubiquitin (polyubiquitin chains) or a linear polymer linked via the initiator Met of the ubiquitin (linear polyubiquitin chai…
ACTN4	9739.XP_004318573.1	9606.ENSP00000252699	1	2±0	ACTN4	Alpha-actinin-4; F-actin cross-linking protein which is thought to anchor actin to a variety of intracellular structures. This is a bundling protein (Probable). Probably involved in vesicular trafficking via its association with the CART complex. The CART complex is necessary for efficient transferrin receptor recycling but not for EGFR degradation. Involved in tight junction assembly in epitheli…							Ubiquitin conjugating enzyme E2 D3; Belongs to the ubiquitin-conjugating enzyme family
CD9	9739.XP_004323963.1	9606.ENSP00000371958	1	2.01±0.01	CD9	CD9 antigen; Involved in platelet activation and aggregation. Regulates paranodal junction formation. Involved in cell adhesion, cell motility and tumor metastasis. Required for sperm-egg fusion; Belongs to the tetraspanin (TM4SF) family							UDP-glucose:glycoprotein glucosyltransferase 1; Recognizes glycoproteins with minor folding defects. Reglucosylates single N-glycans near the misfolded part of the protein, thus providing quality control for protein folding in the endoplasmic reticulum. Reglucosylated proteins are recognized by calreticulin for recycling to the endoplasmic reticulum and refolding or degradation; UDP-glucose glyco…
CDC34	9739.XP_004314258.1	9606.ENSP00000215574	1	2.02±0.03	CDC34	Ubiquitin-conjugating enzyme E2 R1; Accepts ubiquitin from the E1 complex and catalyzes its covalent attachment to other proteins. In vitro catalyzes 'Lys- 48'-linked polyubiquitination. Cooperates with the E2 UBCH5C and the SCF(FBXW11) E3 ligase complex for the polyubiquitination of NFKBIA leading to its subsequent proteasomal degradation. Performs ubiquitin chain elongation building ubiquitin c…							Ubiquitin carboxyl-terminal hydrolase 5; Cleaves linear and branched multiubiquitin polymers with a marked preference for branched polymers. Involved in unanchored 'Lys-48'-linked polyubiquitin disassembly. Binds linear and 'Lys- 63'-linked polyubiquitin with a lower affinity. Knock-down of USP5 causes the accumulation of p53/TP53 and an increase in p53/TP53 transcriptional activity because the u…
COPG1	9739.XP_004313094.1	9606.ENSP00000325002	1	2±0.01	COPG1	Coatomer subunit gamma-1; The coatomer is a cytosolic protein complex that binds to dilysine motifs and reversibly associates with Golgi non- clathrin-coated vesicles, which further mediate biosynthetic protein transport from the ER, via the Golgi up to the trans Golgi network. Coatomer complex is required for budding from Golgi membranes, and is essential for the retrograde Golgi-to-ER transport…							Ubiquitin carboxyl-terminal hydrolase 7; Hydrolase that deubiquitinates target proteins such as FOXO4, p53/TP53, MDM2, ERCC6, DNMT1, UHRF1, PTEN and DAXX. Together with DAXX, prevents MDM2 self-ubiquitination and enhances the E3 ligase activity of MDM2 towards p53/TP53, thereby promoting p53/TP53 ubiquitination and proteasomal degradation. Deubiquitinates p53/TP53, preventing degradation of p53/T…
EHD1	9739.XP_004316748.1	9606.ENSP00000479153	1	2±0	EHD1	EH domain-containing protein 1; ATP- and membrane-binding protein that controls membrane reorganization/tubulation upon ATP hydrolysis. In vitro causes vesiculation of endocytic membranes. Acts in early endocytic membrane fusion and membrane trafficking of recycling endosomes. Recruited to endosomal membranes upon nerve growth factor stimulation, indirectly regulates neurite outgrowth (By similar…							Vesicle-associated membrane protein-associated protein A; VAMP associated protein A
HSD17B12	9739.XP_004313153.1	9606.ENSP00000278353	1	2±0	HSD17B12	Very-long-chain 3-oxoacyl-CoA reductase; Catalyzes the second of the four reactions of the long- chain fatty acids elongation cycle. This endoplasmic reticulum- bound enzymatic process, allows the addition of two carbons to the chain of long- and very long-chain fatty acids/VLCFAs per cycle. This enzyme has a 3-ketoacyl-CoA reductase activity, reducing 3- ketoacyl-CoA to 3-hydroxyacyl-CoA, within…							Transitional endoplasmic reticulum ATPase; Necessary for the fragmentation of Golgi stacks during mitosis and for their reassembly after mitosis. Involved in the formation of the transitional endoplasmic reticulum (tER). The transfer of membranes from the endoplasmic reticulum to the Golgi apparatus occurs via 50-70 nm transition vesicles which derive from part-rough, part-smooth transitional ele…
IGFBP7	NA	9606.ENSP00000295666	1	2±0	IGFBP7	Insulin-like growth factor-binding protein 7; Binds IGF-I and IGF-II with a relatively low affinity. Stimulates prostacyclin (PGI2) production. Stimulates cell adhesion; I-set domain containing							Voltage-dependent anion-selective channel protein 2; Forms a channel through the mitochondrial outer membrane that allows diffusion of small hydrophilic molecules. The channel adopts an open conformation at low or zero membrane potential and a closed conformation at potentials above 30-40 mV. The open state has a weak anion selectivity whereas the closed state is cation- selective; Belongs to the…
PPP1R7	9739.XP_004316990.1	9606.ENSP00000234038	1	2.07±0.12	PPP1R7	Protein phosphatase 1 regulatory subunit 7; Regulatory subunit of protein phosphatase 1; Belongs to the SDS22 family							Voltage-dependent anion-selective channel protein 3; Forms a channel through the mitochondrial outer membrane that allows diffusion of small hydrophilic molecules; Belongs to the eukaryotic mitochondrial porin family
RNASE10	NA	9606.ENSP00000333358	1	1.92±0.11	RNASE10	Inactive ribonuclease-like protein 10; Secreted proximal epididymal protein required for post- testicular sperm maturation and male fertility. May be involved in sperm adhesion to the egg zona pellucida. Does not have ribonuclease activity (By similarity)							Vesicle transport through interaction with t-SNAREs homolog 1B; V-SNARE that mediates vesicle transport pathways through interactions with t-SNAREs on the target membrane. These interactions are proposed to mediate aspects of the specificity of vesicle trafficking and to promote fusion of the lipid bilayers. May be concerned with increased secretion of cytokines associated with cellular senescenc…
SHCBP1L	9739.XP_004329005.1	9606.ENSP00000356518	1	2±0	SHCBP1L	Testicular spindle-associated protein SHCBP1L; Testis-specific spindle-associated factor that plays a role in spermatogenesis. In association with HSPA2, participates in the maintenance of spindle integrity during meiosis in male germ cells							WD repeat-containing protein 54; WD repeat domain containing
TMEM205	9739.XP_004316048.1	9606.ENSP00000346954	1	2.01±0.24	TMEM205	Transmembrane protein 205; In cancer cells, plays a role in resistance to the chemotherapeutic agent cisplatin							14-3-3 protein epsilon; Adapter protein implicated in the regulation of a large spectrum of both general and specialized signaling pathways. Binds to a large number of partners, usually by recognition of a phosphoserine or phosphothreonine motif. Binding generally results in the modulation of the activity of the binding partner (By similarity). Positively regulates phosphorylated protein HSF1 nuc…
UGGT1	9739.XP_004325251.1	9606.ENSP00000259253	1	2±0	UGGT1	UDP-glucose:glycoprotein glucosyltransferase 1; Recognizes glycoproteins with minor folding defects. Reglucosylates single N-glycans near the misfolded part of the protein, thus providing quality control for protein folding in the endoplasmic reticulum. Reglucosylated proteins are recognized by calreticulin for recycling to the endoplasmic reticulum and refolding or degradation; UDP-glucose glyco…							14-3-3 protein theta; Adapter protein implicated in the regulation of a large spectrum of both general and specialized signaling pathways. Binds to a large number of partners, usually by recognition of a phosphoserine or phosphothreonine motif. Binding generally results in the modulation of the activity of the binding partner. Negatively regulates the kinase activity of PDPK1; Belongs to the 14-3…
VTI1B	9739.XP_004313458.1	9606.ENSP00000450731	1	2±0	VTI1B	Vesicle transport through interaction with t-SNAREs homolog 1B; V-SNARE that mediates vesicle transport pathways through interactions with t-SNAREs on the target membrane. These interactions are proposed to mediate aspects of the specificity of vesicle trafficking and to promote fusion of the lipid bilayers. May be concerned with increased secretion of cytokines associated with cellular senescenc…							14-3-3 protein zeta/delta; Adapter protein implicated in the regulation of a large spectrum of both general and specialized signaling pathways. Binds to a large number of partners, usually by recognition of a phosphoserine or phosphothreonine motif. Binding generally results in the modulation of the activity of the binding partner; Belongs to the 14-3-3 family
